# Supplementary material for: Magnetic relaxation in a Co(ii) chain complex: synthesis, structure, and DFT computational coupling constant
Source: Royal Society of Chemistry journal article supplement (doi:10.1039/d0ce01662d), 2021-01-01
Supplement: d0ce01662d1.pdf [file d0ce01662d1.pdf]

## HS

bfgs converged in 157 scf cycles and 148 bfgs steps

(criteria: energy < 1.0E-04 Ry, force < 1.0E-05Ry/Bohr, cell < 5.0E-01kbar)

End of BFGS Geometry Optimization

Final enthalpy = -4090.8491729027 Ry

Begin final coordinates

new unit-cell volume = 12745.38178 a.u.^3 ( 1888.67070 Ang^3 )

density = 1.83229 g/cm^3

CELL\_PARAMETERS (angstrom)

|              |              |              |
|--------------|--------------|--------------|
| 8.814039804  | 0.000000000  | 0.035738397  |
| 0.000000000  | 13.651369837 | 0.000000000  |
| -4.342536496 | 0.000000000  | 15.678970981 |

ATOMIC\_POSITIONS (crystal)

|     |              |              |              |
|-----|--------------|--------------|--------------|
| Co1 | 0.6406322674 | 0.5024247113 | 0.4561474679 |
| Co1 | 0.3593677326 | 0.4975752887 | 0.5438525621 |
| Co1 | 0.3593677326 | 0.0024247113 | 0.0438525321 |
| Co1 | 0.6406322674 | 0.9975752887 | 0.9561474379 |
| Co1 | 0.9946352330 | 0.6349076177 | 0.5932176532 |
| Co1 | 0.0053647670 | 0.3650923823 | 0.4067823468 |
| Co1 | 0.0053647670 | 0.1349076177 | 0.9067823468 |
| Co1 | 0.9946352330 | 0.8650923823 | 0.0932176532 |
| Cl  | 0.9149738192 | 0.7186093692 | 0.6935441684 |
| Cl  | 0.0850261808 | 0.2813906308 | 0.3064558316 |
| Cl  | 0.0850261808 | 0.2186093692 | 0.8064558316 |
| Cl  | 0.9149738192 | 0.7813906308 | 0.1935441684 |
| Cl  | 0.2581890935 | 0.6440186707 | 0.6240697097 |
| Cl  | 0.7418109065 | 0.3559813293 | 0.3759302903 |
| Cl  | 0.7418109065 | 0.1440186707 | 0.8759302903 |
| Cl  | 0.2581890935 | 0.8559813293 | 0.1240697097 |
| O   | 0.4832047592 | 0.3999792856 | 0.4809736798 |
| O   | 0.5167952708 | 0.6000207144 | 0.5190263202 |
| O   | 0.5167952708 | 0.8999792856 | 0.0190263202 |
| O   | 0.4832047592 | 0.1000207144 | 0.9809736798 |
| N   | 0.5108359650 | 0.5395902695 | 0.3302022711 |
| N   | 0.4891640350 | 0.4604097305 | 0.6697976989 |
| N   | 0.4891640350 | 0.0395902695 | 0.1697977289 |
| N   | 0.5108359650 | 0.9604097305 | 0.8302023011 |
| N   | 0.7689121983 | 0.6168565032 | 0.4287763945 |
| N   | 0.2310878017 | 0.3831434968 | 0.5712236055 |

|   |              |              |              |
|---|--------------|--------------|--------------|
| N | 0.2310878017 | 0.1168565032 | 0.0712236055 |
| N | 0.7689121983 | 0.8831434968 | 0.9287763945 |
| N | 0.8837995842 | 0.6740226309 | 0.4769783772 |
| N | 0.1162004158 | 0.3259773691 | 0.5230216228 |
| N | 0.1162004158 | 0.1740226309 | 0.0230216228 |
| N | 0.8837995842 | 0.8259773691 | 0.9769783772 |
| N | 0.7921611473 | 0.4521232166 | 0.5683566708 |
| N | 0.2078388527 | 0.5478767834 | 0.4316433292 |
| N | 0.2078388527 | 0.9521232166 | 0.9316433292 |
| N | 0.7921611473 | 0.0478767834 | 0.0683566708 |
| N | 0.9200317947 | 0.5015326544 | 0.6179382848 |
| N | 0.0799682053 | 0.4984673456 | 0.3820617152 |
| N | 0.0799682053 | 0.0015326544 | 0.8820617152 |
| N | 0.9200317947 | 0.9984673456 | 0.1179382848 |
| N | 0.8936251388 | 0.3656558015 | 0.6824622147 |
| N | 0.1063748612 | 0.6343441985 | 0.3175377853 |
| N | 0.1063748612 | 0.8656558015 | 0.8175377853 |
| N | 0.8936251388 | 0.1343441985 | 0.1824622147 |
| H | 0.9243034065 | 0.3088642634 | 0.7261593605 |
| H | 0.0756965935 | 0.6911357366 | 0.2738406395 |
| H | 0.0756965935 | 0.8088642634 | 0.7738406395 |
| H | 0.9243034065 | 0.1911357366 | 0.2261593605 |
| H | 0.3517011285 | 0.4254134141 | 0.3097008201 |
| H | 0.6482988715 | 0.5745866159 | 0.6902992089 |
| H | 0.6482988715 | 0.9254133841 | 0.1902991799 |
| H | 0.3517011285 | 0.0745865859 | 0.8097007911 |
| H | 0.2217891616 | 0.4746311402 | 0.1579367007 |
| H | 0.7782108234 | 0.5253688898 | 0.8420632853 |
| H | 0.7782108234 | 0.9746311102 | 0.3420632853 |
| H | 0.2217891616 | 0.0253688598 | 0.6579367147 |
| H | 0.3215629573 | 0.6250288224 | 0.0987906951 |
| H | 0.6784370127 | 0.3749711776 | 0.9012093339 |
| H | 0.6784370127 | 0.1250288224 | 0.4012093049 |
| H | 0.3215629573 | 0.8749711776 | 0.5987906661 |
| H | 0.5440895597 | 0.7182922292 | 0.1912122892 |
| H | 0.4559104403 | 0.2817077708 | 0.8087877258 |
| H | 0.4559104403 | 0.2182922292 | 0.3087877258 |
| H | 0.5440895597 | 0.7817077708 | 0.6912122742 |
| H | 0.7405516338 | 0.8162700878 | 0.3114418718 |
| H | 0.2594483662 | 0.1837299122 | 0.6885581572 |
| H | 0.2594483662 | 0.3162700878 | 0.1885581282 |
| H | 0.7405516338 | 0.6837299122 | 0.8114418428 |
| H | 0.1074204580 | 0.8116658657 | 0.5141600885 |
| H | 0.8925795420 | 0.1883341343 | 0.4858399115 |

|   |              |              |              |
|---|--------------|--------------|--------------|
| H | 0.8925795420 | 0.3116658657 | 0.9858399115 |
| H | 0.1074204580 | 0.6883341343 | 0.0141600885 |
| H | 0.9436481314 | 0.8841542683 | 0.5212792069 |
| H | 0.0563518686 | 0.1158457317 | 0.4787207931 |
| H | 0.0563518686 | 0.3841542683 | 0.9787207931 |
| H | 0.9436481314 | 0.6158457317 | 0.0212792069 |
| H | 0.0179646673 | 0.8923063749 | 0.4295947337 |
| H | 0.9820353327 | 0.1076936251 | 0.5704052663 |
| H | 0.9820353327 | 0.3923063749 | 0.0704052663 |
| H | 0.0179646673 | 0.6076936251 | 0.9295947337 |
| H | 0.3193660642 | 0.2439941017 | 0.4292554328 |
| H | 0.6806339358 | 0.7560058683 | 0.5707445672 |
| H | 0.6806339358 | 0.7439941317 | 0.0707445672 |
| H | 0.3193660642 | 0.2560058983 | 0.9292554328 |
| H | 0.3739374920 | 0.0773268065 | 0.4917026775 |
| H | 0.6260625080 | 0.9226732085 | 0.5082973225 |
| H | 0.6260625080 | 0.5773267915 | 0.0082973225 |
| H | 0.3739374920 | 0.4226732085 | 0.9917026775 |
| H | 0.6089153446 | 0.0482423232 | 0.6138768186 |
| H | 0.3910846554 | 0.9517576918 | 0.3861231814 |
| H | 0.3910846554 | 0.5482423082 | 0.8861231814 |
| H | 0.6089153446 | 0.4517576918 | 0.1138768186 |
| H | 0.7964028925 | 0.1837313653 | 0.6658352300 |
| H | 0.2035971075 | 0.8162686637 | 0.3341647700 |
| H | 0.2035971075 | 0.6837313363 | 0.8341647700 |
| H | 0.7964028925 | 0.3162686347 | 0.1658352300 |
| H | 0.1934669920 | 0.5249111177 | 0.7397053530 |
| H | 0.8065330080 | 0.4750888823 | 0.2602946470 |
| H | 0.8065330080 | 0.0249111177 | 0.7602946470 |
| H | 0.1934669920 | 0.9750888823 | 0.2397053530 |
| H | 0.1745258274 | 0.4106963350 | 0.7910386774 |
| H | 0.8254741726 | 0.5893036650 | 0.2089613226 |
| H | 0.8254741726 | 0.9106963350 | 0.7089613226 |
| H | 0.1745258274 | 0.0893036650 | 0.2910386774 |
| H | 0.0668893490 | 0.5156741201 | 0.8085654468 |
| H | 0.9331106510 | 0.4843258799 | 0.1914345532 |
| H | 0.9331106510 | 0.0156741201 | 0.6914345532 |
| H | 0.0668893490 | 0.9843258799 | 0.3085654468 |
| C | 0.3908398796 | 0.4891707304 | 0.2801300164 |
| C | 0.6091601204 | 0.5108292696 | 0.7198700126 |
| C | 0.6091601204 | 0.9891707304 | 0.2198699836 |
| C | 0.3908398796 | 0.0108292696 | 0.7801299874 |
| C | 0.3189237104 | 0.5173438806 | 0.1966350368 |
| C | 0.6810762596 | 0.4826561194 | 0.8033649932 |

|   |              |              |              |
|---|--------------|--------------|--------------|
| C | 0.6810762596 | 0.0173438806 | 0.3033649632 |
| C | 0.3189237104 | 0.9826561194 | 0.6966350068 |
| C | 0.3738556558 | 0.6008168417 | 0.1639226440 |
| C | 0.6261443732 | 0.3991831583 | 0.8360773260 |
| C | 0.6261443732 | 0.1008168417 | 0.3360773560 |
| C | 0.3738556558 | 0.8991831583 | 0.6639226740 |
| C | 0.4984651691 | 0.6531946721 | 0.2152078008 |
| C | 0.5015348009 | 0.3468053279 | 0.7847921842 |
| C | 0.5015348009 | 0.1531946721 | 0.2847921842 |
| C | 0.4984651691 | 0.8468053279 | 0.7152078158 |
| C | 0.5657252143 | 0.6205374581 | 0.2983575776 |
| C | 0.4342747857 | 0.3794625419 | 0.7016423924 |
| C | 0.4342747857 | 0.1205374581 | 0.2016424224 |
| C | 0.5657252143 | 0.8794625419 | 0.7983576076 |
| C | 0.6983507030 | 0.6673887897 | 0.3572302274 |
| C | 0.3016492970 | 0.3326112103 | 0.6427697426 |
| C | 0.3016492970 | 0.1673887897 | 0.1427697726 |
| C | 0.6983507030 | 0.8326112103 | 0.8572302574 |
| C | 0.7703344814 | 0.7592640773 | 0.3590482163 |
| C | 0.2296655186 | 0.2407359227 | 0.6409517837 |
| C | 0.2296655186 | 0.2592640773 | 0.1409517837 |
| C | 0.7703344814 | 0.7407359227 | 0.8590482163 |
| C | 0.8862479536 | 0.7613671402 | 0.4360832463 |
| C | 0.1137520464 | 0.2386328598 | 0.5639167537 |
| C | 0.1137520464 | 0.2613671402 | 0.0639167537 |
| C | 0.8862479536 | 0.7386328598 | 0.9360832463 |
| C | 0.9943464759 | 0.8417286283 | 0.4772233708 |
| C | 0.0056535241 | 0.1582713717 | 0.5227766292 |
| C | 0.0056535241 | 0.3417286283 | 0.0227766292 |
| C | 0.9943464759 | 0.6582713717 | 0.9772233708 |
| C | 0.5240451302 | 0.3102126368 | 0.5117558993 |
| C | 0.4759548698 | 0.6897873632 | 0.4882441007 |
| C | 0.4759548698 | 0.8102126368 | 0.9882441007 |
| C | 0.5240451302 | 0.1897873632 | 0.0117558993 |
| C | 0.4243314023 | 0.2300893569 | 0.4807864048 |
| C | 0.5756686277 | 0.7699106581 | 0.5192135952 |
| C | 0.5756686277 | 0.7300893419 | 0.0192135952 |
| C | 0.4243314023 | 0.2699106581 | 0.9807864048 |
| C | 0.4551989124 | 0.1373441442 | 0.5163199960 |
| C | 0.5448010876 | 0.8626558408 | 0.4836800040 |
| C | 0.5448010876 | 0.6373441592 | 0.9836800040 |
| C | 0.4551989124 | 0.3626558408 | 0.0163199960 |
| C | 0.5878181803 | 0.1203333959 | 0.5842883439 |
| C | 0.4121818197 | 0.8796666041 | 0.4157116561 |

|   |              |              |              |
|---|--------------|--------------|--------------|
| C | 0.4121818197 | 0.6203333959 | 0.9157116561 |
| C | 0.5878181803 | 0.3796666041 | 0.0842883439 |
| C | 0.6914600021 | 0.1969651522 | 0.6137757039 |
| C | 0.3085399979 | 0.8030348778 | 0.3862242961 |
| C | 0.3085399979 | 0.6969651222 | 0.8862242961 |
| C | 0.6914600021 | 0.3030348478 | 0.1137757039 |
| C | 0.6639095289 | 0.2911579653 | 0.5775004786 |
| C | 0.3360904711 | 0.7088420347 | 0.4224995214 |
| C | 0.3360904711 | 0.7911579653 | 0.9224995214 |
| C | 0.6639095289 | 0.2088420347 | 0.0775004786 |
| C | 0.7776934216 | 0.3682102791 | 0.6077586490 |
| C | 0.2223065784 | 0.6317897209 | 0.3922413510 |
| C | 0.2223065784 | 0.8682102791 | 0.8922413510 |
| C | 0.7776934216 | 0.1317897209 | 0.1077586490 |
| C | 0.9799186340 | 0.4487349976 | 0.6875099384 |
| C | 0.0200813660 | 0.5512650324 | 0.3124900616 |
| C | 0.0200813660 | 0.9487349676 | 0.8124900616 |
| C | 0.9799186340 | 0.0512650024 | 0.1875099384 |
| C | 0.1121210107 | 0.4762702791 | 0.7608772618 |
| C | 0.8878789893 | 0.5237297509 | 0.2391227382 |
| C | 0.8878789893 | 0.9762702491 | 0.7391227382 |
| C | 0.1121210107 | 0.0237297209 | 0.2608772618 |

## BS1

bfgs converged in 151 scf cycles and 145 bfgs steps

(criteria: energy < 1.0E-04 Ry, force < 1.0E-05Ry/Bohr, cell < 5.0E-01kbar)

End of BFGS Geometry Optimization

Final enthalpy = -4090.8509100541 Ry

Begin final coordinates

new unit-cell volume = 12744.02226 a.u.^3 ( 1888.46924 Ang^3 )

density = 1.83248 g/cm^3

CELL\_PARAMETERS (angstrom)

|              |              |              |
|--------------|--------------|--------------|
| 8.814631061  | -0.000049088 | 0.034059193  |
| 0.000170049  | 13.648057153 | 0.001052997  |
| -4.345776783 | 0.001536681  | 15.680869179 |

ATOMIC\_POSITIONS (crystal)

|     |              |              |              |
|-----|--------------|--------------|--------------|
| Co1 | 0.6404306642 | 0.5025573919 | 0.4563032619 |
| Co1 | 0.3591116546 | 0.4980673730 | 0.5441713723 |
| Co1 | 0.3595246849 | 0.0024564167 | 0.0438647732 |
| Co1 | 0.6406983631 | 0.9976070287 | 0.9561110345 |

|     |              |              |              |
|-----|--------------|--------------|--------------|
| Co2 | 0.9937917608 | 0.6349209848 | 0.5934186528 |
| Co1 | 0.0054835021 | 0.3653173087 | 0.4067915518 |
| Co1 | 0.0053686428 | 0.1349863672 | 0.9068367720 |
| Co1 | 0.9948450733 | 0.8651725204 | 0.0931741634 |
| Cl  | 0.9151747886 | 0.7184581783 | 0.6938912254 |
| Cl  | 0.0847763856 | 0.2815866592 | 0.3063757383 |
| Cl  | 0.0849809273 | 0.2185440878 | 0.8064319769 |
| Cl  | 0.9150306553 | 0.7815567173 | 0.1934702108 |
| Cl  | 0.2572434147 | 0.6430580113 | 0.6230566012 |
| Cl  | 0.7419620441 | 0.3561237237 | 0.3760552368 |
| Cl  | 0.7417989386 | 0.1440652843 | 0.8759443467 |
| Cl  | 0.2583838794 | 0.8559685559 | 0.1240703754 |
| O   | 0.4828469728 | 0.4001437054 | 0.4809651683 |
| O   | 0.5169746209 | 0.6002476042 | 0.5191692898 |
| O   | 0.5169229000 | 0.8999725420 | 0.0190125260 |
| O   | 0.4832337566 | 0.1000596491 | 0.9809290741 |
| N   | 0.5107119843 | 0.5395635120 | 0.3302745986 |
| N   | 0.4892469836 | 0.4605304988 | 0.6699724193 |
| N   | 0.4893845634 | 0.0395599784 | 0.1698126077 |
| N   | 0.5107657585 | 0.9603765484 | 0.8301560481 |
| N   | 0.7685995373 | 0.6168884611 | 0.4289391831 |
| N   | 0.2311953440 | 0.3832914246 | 0.5712868222 |
| N   | 0.2312554935 | 0.1168809578 | 0.0712493655 |
| N   | 0.7689420427 | 0.8831414089 | 0.9287432223 |
| N   | 0.8834283012 | 0.6739269192 | 0.4771157052 |
| N   | 0.1162636840 | 0.3261662835 | 0.5230574824 |
| N   | 0.1163111504 | 0.1740722608 | 0.0230724124 |
| N   | 0.8839136846 | 0.8259972479 | 0.9769598006 |
| N   | 0.7916363921 | 0.4521397630 | 0.5684006558 |
| N   | 0.2082715819 | 0.5479749941 | 0.4314839281 |
| N   | 0.2078618155 | 0.9521532886 | 0.9316960244 |
| N   | 0.7922736202 | 0.0479585406 | 0.0683159000 |
| N   | 0.9195119826 | 0.5014964155 | 0.6178630354 |
| N   | 0.0802459329 | 0.4986417096 | 0.3819749970 |
| N   | 0.0799252135 | 0.0015648233 | 0.8821284685 |
| N   | 0.9202251013 | 0.9985732405 | 0.1178935991 |
| N   | 0.8933585759 | 0.3655537013 | 0.6823993857 |
| N   | 0.1066778043 | 0.6345121506 | 0.3174110888 |
| N   | 0.1063010647 | 0.8656673813 | 0.8176229521 |
| N   | 0.8936618292 | 0.1344126496 | 0.1824406107 |
| H   | 0.9241303072 | 0.3087332318 | 0.7260885148 |
| H   | 0.0759523079 | 0.6913278342 | 0.2737240587 |
| H   | 0.0756019129 | 0.8088555875 | 0.7739442313 |
| H   | 0.9242680768 | 0.1912020755 | 0.2261557611 |

|   |              |              |              |
|---|--------------|--------------|--------------|
| H | 0.3514472466 | 0.4254373529 | 0.3098510518 |
| H | 0.6484831773 | 0.5746756987 | 0.6905790894 |
| H | 0.6484736735 | 0.9253202370 | 0.1903193443 |
| H | 0.3516760188 | 0.0746168072 | 0.8095646434 |
| H | 0.2217127075 | 0.4744906283 | 0.1580089990 |
| H | 0.7784631686 | 0.5252257691 | 0.8422840212 |
| H | 0.7784053625 | 0.9744599323 | 0.3420866487 |
| H | 0.2214950196 | 0.0252087227 | 0.6578928843 |
| H | 0.3217841009 | 0.6247076231 | 0.0987236813 |
| H | 0.6785119090 | 0.3747840174 | 0.9013192323 |
| H | 0.6787326450 | 0.1249008671 | 0.4012365122 |
| H | 0.3210050320 | 0.8746020865 | 0.5988991582 |
| H | 0.5444101723 | 0.7179705796 | 0.1910852408 |
| H | 0.4558767524 | 0.2816594621 | 0.8088207581 |
| H | 0.4561912199 | 0.2182256821 | 0.3088322489 |
| H | 0.5436332880 | 0.7813741144 | 0.6913600752 |
| H | 0.7413067864 | 0.8159792885 | 0.3112592449 |
| H | 0.2594089221 | 0.1837731498 | 0.6885570214 |
| H | 0.2596187090 | 0.3162456978 | 0.1886559607 |
| H | 0.7403441414 | 0.6835455021 | 0.8116081131 |
| H | 0.1084184625 | 0.8113931087 | 0.5133717336 |
| H | 0.8924416939 | 0.1885720402 | 0.4858956863 |
| H | 0.8926202481 | 0.3117295662 | 0.9859656406 |
| H | 0.1074937144 | 0.6883230976 | 0.0142635150 |
| H | 0.9449663399 | 0.8833688461 | 0.5218579494 |
| H | 0.0561292248 | 0.1160586081 | 0.4786707229 |
| H | 0.0563571886 | 0.3842569523 | 0.9788358908 |
| H | 0.9437420186 | 0.6158237054 | 0.0214043227 |
| H | 0.0171509646 | 0.8925102651 | 0.4295386024 |
| H | 0.9820070024 | 0.1078224102 | 0.5703883193 |
| H | 0.9821534908 | 0.3923568360 | 0.0705288896 |
| H | 0.0180425034 | 0.6076034094 | 0.9297501294 |
| H | 0.3189998139 | 0.2441596745 | 0.4290327893 |
| H | 0.6807104782 | 0.7562958817 | 0.5708817541 |
| H | 0.6808388784 | 0.7439404564 | 0.0706759844 |
| H | 0.3192630732 | 0.2560702193 | 0.9292399731 |
| H | 0.3734058011 | 0.0774021992 | 0.4913723425 |
| H | 0.6263394276 | 0.9229424446 | 0.5082265456 |
| H | 0.6261681889 | 0.5772406297 | 0.0082551033 |
| H | 0.3737248860 | 0.4227500883 | 0.9917290628 |
| H | 0.6082466860 | 0.0481487354 | 0.6136367234 |
| H | 0.3915761419 | 0.9519319798 | 0.3858735749 |
| H | 0.3910006759 | 0.5481628692 | 0.8861561730 |
| H | 0.6087343813 | 0.4518384238 | 0.1139186104 |

|   |              |              |              |
|---|--------------|--------------|--------------|
| H | 0.7957891209 | 0.1836008771 | 0.6657753954 |
| H | 0.2041875047 | 0.8163901916 | 0.3338674294 |
| H | 0.2034428664 | 0.6836925971 | 0.8342762489 |
| H | 0.7963295068 | 0.3163451587 | 0.1658423675 |
| H | 0.1935730270 | 0.5245056353 | 0.7395125695 |
| H | 0.8066425611 | 0.4753230051 | 0.2603039293 |
| H | 0.8063511475 | 0.0249071910 | 0.7603590731 |
| H | 0.1937286951 | 0.9752643797 | 0.2396756006 |
| H | 0.1739699057 | 0.4105479137 | 0.7910958786 |
| H | 0.8255644515 | 0.5895220395 | 0.2089014822 |
| H | 0.8252914629 | 0.9106408243 | 0.7090979303 |
| H | 0.1746219825 | 0.0894456418 | 0.2910332800 |
| H | 0.0668564151 | 0.5159386656 | 0.8082989186 |
| H | 0.9330784568 | 0.4844586160 | 0.1914013415 |
| H | 0.9328428048 | 0.0156484642 | 0.6914926471 |
| H | 0.0671516417 | 0.9843407484 | 0.3085059347 |
| C | 0.3906974770 | 0.4891239327 | 0.2802247081 |
| C | 0.6093066144 | 0.5108729413 | 0.7200913584 |
| C | 0.6093707053 | 0.9890919257 | 0.2198855087 |
| C | 0.3907214624 | 0.0107769379 | 0.7800588965 |
| C | 0.3188907703 | 0.5172016832 | 0.1966829425 |
| C | 0.6812533021 | 0.4825805064 | 0.8035573239 |
| C | 0.6813073294 | 0.0172270420 | 0.3033861198 |
| C | 0.3186384984 | 0.9824909408 | 0.6966147047 |
| C | 0.3739899920 | 0.6005768105 | 0.1638933728 |
| C | 0.6262323342 | 0.3990806450 | 0.8362077673 |
| C | 0.6264144673 | 0.1007127004 | 0.3361026754 |
| C | 0.3734309376 | 0.8989046647 | 0.6639879880 |
| C | 0.4986575166 | 0.6529548017 | 0.2151474653 |
| C | 0.5015642287 | 0.3467776400 | 0.7848763245 |
| C | 0.5017969397 | 0.1531290845 | 0.2848228667 |
| C | 0.4980869537 | 0.8465436117 | 0.7152969455 |
| C | 0.5657744338 | 0.6204080522 | 0.2983577920 |
| C | 0.4343321577 | 0.3795242994 | 0.7017426607 |
| C | 0.4345049469 | 0.1205052732 | 0.2016680293 |
| C | 0.5655469505 | 0.8793376306 | 0.7983857329 |
| C | 0.6983638922 | 0.6672814725 | 0.3572378100 |
| C | 0.3017126206 | 0.3327054724 | 0.6428233682 |
| C | 0.3018391373 | 0.1673845946 | 0.1428067645 |
| C | 0.6982754216 | 0.8325315512 | 0.8572623251 |
| C | 0.7707440377 | 0.7590425733 | 0.3589655707 |
| C | 0.2296645068 | 0.2408248699 | 0.6409698190 |
| C | 0.2298202373 | 0.2592640408 | 0.1410275358 |
| C | 0.7702623855 | 0.7406279256 | 0.8591376624 |



|   |              |              |              |
|---|--------------|--------------|--------------|
| C | 0.8864800600 | 0.7611405864 | 0.4360846141 |
| C | 0.1137357816 | 0.2387881955 | 0.5639287373 |
| C | 0.1138607058 | 0.2614023046 | 0.0639983241 |
| C | 0.8862931465 | 0.7385890050 | 0.9361412941 |
| C | 0.9947900701 | 0.8414523391 | 0.4771650697 |
| C | 0.0055458393 | 0.1584559787 | 0.5227745041 |
| C | 0.0057189563 | 0.3417929395 | 0.0228884708 |
| C | 0.9944229435 | 0.6582283180 | 0.9773348851 |
| C | 0.5235957074 | 0.3103383208 | 0.5116939283 |
| C | 0.4762134041 | 0.6900044120 | 0.4882555740 |
| C | 0.4760546164 | 0.8101930496 | 0.9882443913 |
| C | 0.5240125728 | 0.1898434819 | 0.0117281726 |
| C | 0.4238960440 | 0.2302060829 | 0.4806083882 |
| C | 0.5758657058 | 0.7701678834 | 0.5192480913 |
| C | 0.5758081641 | 0.7300393582 | 0.0191793225 |
| C | 0.4242266423 | 0.2699760453 | 0.9807794662 |
| C | 0.4546744247 | 0.1374032408 | 0.5160798402 |
| C | 0.5451086193 | 0.8628991570 | 0.4836053186 |
| C | 0.5448861034 | 0.6372779853 | 0.9836535773 |
| C | 0.4550341672 | 0.3627284910 | 0.0163396891 |
| C | 0.5872316108 | 0.1202925548 | 0.5840971853 |
| C | 0.4126185745 | 0.8798506279 | 0.4155262990 |
| C | 0.4121691911 | 0.6202729700 | 0.9157288980 |
| C | 0.5876641188 | 0.3797425062 | 0.0843138378 |
| C | 0.6908904346 | 0.1968945531 | 0.6136832586 |
| C | 0.3090318772 | 0.8031816512 | 0.3860131436 |
| C | 0.3084940211 | 0.6969286193 | 0.8862790286 |
| C | 0.6913695129 | 0.3031073079 | 0.1137823509 |
| C | 0.6633889293 | 0.2911641163 | 0.5774906599 |
| C | 0.3365004731 | 0.7089934160 | 0.4223628429 |
| C | 0.3361080119 | 0.7911440036 | 0.9225410960 |
| C | 0.6638738605 | 0.2089075869 | 0.0774838839 |
| C | 0.7772111556 | 0.3681747489 | 0.6077724144 |
| C | 0.2227170472 | 0.6319087181 | 0.3920886759 |
| C | 0.2223016525 | 0.8682227972 | 0.8923067593 |
| C | 0.7777225486 | 0.1318543232 | 0.1077314289 |
| C | 0.9796112601 | 0.4486615265 | 0.6874135340 |
| C | 0.0202928333 | 0.5514632224 | 0.3124058469 |
| C | 0.0199799924 | 0.9487539893 | 0.8125752863 |
| C | 0.9800583374 | 0.0513600623 | 0.1874762294 |
| C | 0.1119287395 | 0.4761742177 | 0.7607549177 |
| C | 0.8879664091 | 0.5239317818 | 0.2390815885 |
| C | 0.8876940240 | 0.9762535431 | 0.7392091005 |
| C | 0.1123128576 | 0.0238397740 | 0.2608477971 |

## BS2

bfgs converged in 151 scf cycles and 147 bfgs steps

(criteria: energy < 1.0E-04 Ry, force < 1.0E-05Ry/Bohr, cell < 5.0E-01kbar)

End of BFGS Geometry Optimization

Final enthalpy = -4090.8506826749 Ry

Begin final coordinates

new unit-cell volume = 12748.20634 a.u.^3 ( 1889.08925 Ang^3 )

density = 1.83188 g/cm^3

CELL\_PARAMETERS (angstrom)

|              |              |              |
|--------------|--------------|--------------|
| 8.815335410  | -0.001546610 | 0.034764677  |
| -0.002613833 | 13.647440347 | 0.000060169  |
| -4.344865418 | 0.000535367  | 15.685135531 |

ATOMIC\_POSITIONS (crystal)

|     |              |              |              |
|-----|--------------|--------------|--------------|
| Co1 | 0.6405855364 | 0.5025117123 | 0.4561289057 |
| Co1 | 0.3593578510 | 0.4975418033 | 0.5438536396 |
| Co1 | 0.3586157589 | 0.0024090207 | 0.0439845195 |
| Co2 | 0.6416627835 | 0.9977143021 | 0.9559750949 |
| Co1 | 0.9947898231 | 0.6350878082 | 0.5931153106 |
| Co1 | 0.0052145889 | 0.3649924959 | 0.4068233776 |
| Co1 | 0.0055656021 | 0.1352483307 | 0.9065634546 |
| Co1 | 0.9945142325 | 0.8649612470 | 0.0931927476 |
| Cl  | 0.9153154462 | 0.7189316401 | 0.6933562580 |
| Cl  | 0.0848064821 | 0.2811311810 | 0.3066325734 |
| Cl  | 0.0846873061 | 0.2186363388 | 0.8062126797 |
| Cl  | 0.9151024580 | 0.7812679267 | 0.1936108021 |
| Cl  | 0.2583217962 | 0.6439951418 | 0.6239662993 |
| Cl  | 0.7416944504 | 0.3560157190 | 0.3760367552 |
| Cl  | 0.7422255522 | 0.1431883504 | 0.8768277326 |
| Cl  | 0.2581126986 | 0.8559013981 | 0.1238966347 |
| O   | 0.4831671594 | 0.3999954201 | 0.4810031566 |
| O   | 0.5167821237 | 0.6000335250 | 0.5189989494 |
| O   | 0.5167816299 | 0.9004365539 | 0.0188272490 |
| O   | 0.4832665519 | 0.0995611864 | 0.9812381309 |
| N   | 0.5108304007 | 0.5396410080 | 0.3302048190 |
| N   | 0.4891689981 | 0.4603448723 | 0.6698098409 |
| N   | 0.4882984789 | 0.0396165411 | 0.1698218302 |
| N   | 0.5116109626 | 0.9604010969 | 0.8302214029 |
| N   | 0.7689270410 | 0.6169615156 | 0.4287530904 |
| N   | 0.2310687728 | 0.3830583762 | 0.5712214870 |

|   |              |              |              |
|---|--------------|--------------|--------------|
| N | 0.2306707188 | 0.1170781959 | 0.0711505585 |
| N | 0.7689304438 | 0.8827723914 | 0.9289500656 |
| N | 0.8838443952 | 0.6741576598 | 0.4769266968 |
| N | 0.1161401752 | 0.3258862258 | 0.5230313274 |
| N | 0.1159418128 | 0.1742803709 | 0.0229090932 |
| N | 0.8836491681 | 0.8257191270 | 0.9770947837 |
| N | 0.7921505299 | 0.4522553381 | 0.5683098438 |
| N | 0.2078249669 | 0.5478234146 | 0.4316513973 |
| N | 0.2074360647 | 0.9521767944 | 0.9317962672 |
| N | 0.7923477454 | 0.0476523695 | 0.0683934545 |
| N | 0.9200362421 | 0.5017002342 | 0.6178695561 |
| N | 0.0799384388 | 0.4983826495 | 0.3820910753 |
| N | 0.0796939114 | 0.0016226898 | 0.8821918979 |
| N | 0.9200693168 | 0.9982663797 | 0.1179339615 |
| N | 0.8936040779 | 0.3657950596 | 0.6823780432 |
| N | 0.1063866063 | 0.6342838110 | 0.3175670389 |
| N | 0.1064744037 | 0.8658834310 | 0.8175469089 |
| N | 0.8935851754 | 0.1340971353 | 0.1824978852 |
| H | 0.9242217599 | 0.3090019257 | 0.7260657051 |
| H | 0.0756923179 | 0.6910838126 | 0.2738659550 |
| H | 0.0760213958 | 0.8091482081 | 0.7737740970 |
| H | 0.9241321434 | 0.1908664288 | 0.2262322546 |
| H | 0.3516790636 | 0.4254084899 | 0.3096915759 |
| H | 0.6482993610 | 0.5745843661 | 0.6903811353 |
| H | 0.6473603689 | 0.9254185018 | 0.1902728486 |
| H | 0.3526038887 | 0.0746209553 | 0.8098294550 |
| H | 0.2218806086 | 0.4745959643 | 0.1579618937 |
| H | 0.7781225336 | 0.5253031998 | 0.8420896694 |
| H | 0.7776938161 | 0.9748102848 | 0.3419087386 |
| H | 0.2221108230 | 0.0252561805 | 0.6582015829 |
| H | 0.3217439227 | 0.6250107723 | 0.0988283648 |
| H | 0.6783104064 | 0.3748094984 | 0.9011397449 |
| H | 0.6781592076 | 0.1253054471 | 0.4010142711 |
| H | 0.3214727478 | 0.8747278796 | 0.5990570060 |
| H | 0.5442913298 | 0.7183127441 | 0.1912189749 |
| H | 0.4558238589 | 0.2815120821 | 0.8086853276 |
| H | 0.4555392217 | 0.2185200582 | 0.3086973467 |
| H | 0.5440177649 | 0.7814347219 | 0.6913270473 |
| H | 0.7406971016 | 0.8163949946 | 0.3114149147 |
| H | 0.2593498648 | 0.1835544466 | 0.6884694362 |
| H | 0.2586491949 | 0.3163845356 | 0.1886010687 |
| H | 0.7416303253 | 0.6837262755 | 0.8112715491 |
| H | 0.1077899813 | 0.8118544588 | 0.5137420850 |
| H | 0.8922652919 | 0.1881950883 | 0.4860652504 |

|   |              |              |              |
|---|--------------|--------------|--------------|
| H | 0.8921005155 | 0.3119309341 | 0.9859921841 |
| H | 0.1082534849 | 0.6882637672 | 0.0137049320 |
| H | 0.9441668641 | 0.8841123675 | 0.5214106755 |
| H | 0.0559163929 | 0.1158842559 | 0.4785402998 |
| H | 0.0558709107 | 0.3842251128 | 0.9784774517 |
| H | 0.9446413486 | 0.6161293864 | 0.0217052215 |
| H | 0.0175916576 | 0.8926802893 | 0.4294923196 |
| H | 0.9822339378 | 0.1073814928 | 0.5703739030 |
| H | 0.9821245473 | 0.3927561524 | 0.0702814074 |
| H | 0.0176708692 | 0.6072403953 | 0.9296731141 |
| H | 0.3193072522 | 0.2439193901 | 0.4293521475 |
| H | 0.6806205797 | 0.7560910501 | 0.5706949829 |
| H | 0.6808049489 | 0.7444457206 | 0.0706423302 |
| H | 0.3192836374 | 0.2555742395 | 0.9293861989 |
| H | 0.3739148622 | 0.0772374457 | 0.4918205620 |
| H | 0.6261077672 | 0.9227802939 | 0.5082281346 |
| H | 0.6263232705 | 0.5777044081 | 0.0083147879 |
| H | 0.3738618585 | 0.4223404331 | 0.9916803545 |
| H | 0.6089628056 | 0.0482102032 | 0.6139033224 |
| H | 0.3911862772 | 0.9518193508 | 0.3860675258 |
| H | 0.3911599708 | 0.5483874543 | 0.8863247514 |
| H | 0.6090130603 | 0.4516237273 | 0.1136712003 |
| H | 0.7965102948 | 0.1837804335 | 0.6657524995 |
| H | 0.2036671890 | 0.8162573080 | 0.3341419596 |
| H | 0.2034402862 | 0.6837935554 | 0.8344214114 |
| H | 0.7966056611 | 0.3161770332 | 0.1656408206 |
| H | 0.1934929506 | 0.5251229458 | 0.7396397745 |
| H | 0.8064903405 | 0.4749695492 | 0.2603358028 |
| H | 0.8064590019 | 0.0249604793 | 0.7602631195 |
| H | 0.1937035992 | 0.9751338452 | 0.2397178118 |
| H | 0.1745548171 | 0.4108164713 | 0.7908699262 |
| H | 0.8255204723 | 0.5892274028 | 0.2090367045 |
| H | 0.8257505454 | 0.9108362627 | 0.7088837609 |
| H | 0.1740741019 | 0.0891069428 | 0.2912588394 |
| H | 0.0669585958 | 0.5157699910 | 0.8084709682 |
| H | 0.9330845244 | 0.4842145158 | 0.1915285758 |
| H | 0.9332799621 | 0.0160081867 | 0.6915683760 |
| H | 0.0668176458 | 0.9837204115 | 0.3083933340 |
| C | 0.3908534225 | 0.4891835097 | 0.2801364260 |
| C | 0.6091483617 | 0.5107752984 | 0.7199047688 |
| C | 0.6083606466 | 0.9892252720 | 0.2198354901 |
| C | 0.3915263688 | 0.0108026294 | 0.7802468071 |
| C | 0.3190040928 | 0.5173351712 | 0.1966551186 |
| C | 0.6810275017 | 0.4825654776 | 0.8033676085 |

|   |              |              |              |
|---|--------------|--------------|--------------|
| C | 0.6804966743 | 0.0174884866 | 0.3032524103 |
| C | 0.3192983879 | 0.9825539308 | 0.6968361988 |
| C | 0.3739964490 | 0.6008125947 | 0.1639465247 |
| C | 0.6260772456 | 0.3990325708 | 0.8360249583 |
| C | 0.6256891223 | 0.1010147954 | 0.3359438776 |
| C | 0.3740105119 | 0.8990109424 | 0.6641218812 |
| C | 0.4986029852 | 0.6532203305 | 0.2152194606 |
| C | 0.5014942248 | 0.3466374562 | 0.7847196454 |
| C | 0.5010298115 | 0.1533709474 | 0.2847146210 |
| C | 0.4986521931 | 0.8466176862 | 0.7153275142 |
| C | 0.5657809996 | 0.6205935072 | 0.2983609594 |
| C | 0.4342530826 | 0.3793462465 | 0.7016042163 |
| C | 0.4335805547 | 0.1206493170 | 0.2016265355 |
| C | 0.5662099013 | 0.8793427061 | 0.7984025582 |
| C | 0.6983990812 | 0.6674839972 | 0.3572196156 |
| C | 0.3016050221 | 0.3325016995 | 0.6427349281 |
| C | 0.3010259606 | 0.1675319089 | 0.1427607511 |
| C | 0.6987389520 | 0.8324278879 | 0.8572511362 |
| C | 0.7704180867 | 0.7593860417 | 0.3590190268 |
| C | 0.2295673935 | 0.2406022740 | 0.6409057252 |
| C | 0.2290438649 | 0.2594235230 | 0.1409445799 |
| C | 0.7710167856 | 0.7406360394 | 0.8589848936 |
| C | 0.8863282944 | 0.7615109306 | 0.4360241085 |
| C | 0.1136431710 | 0.2385127669 | 0.5639005723 |
| C | 0.1133641917 | 0.2615930094 | 0.0638551311 |
| C | 0.8866840584 | 0.7385001859 | 0.9360889212 |
| C | 0.9945000906 | 0.8418965564 | 0.4771118581 |
| C | 0.0054837727 | 0.1581373501 | 0.5227761728 |
| C | 0.0053508883 | 0.3419825248 | 0.0227056411 |
| C | 0.9948435258 | 0.6581794443 | 0.9772373504 |
| C | 0.5240161700 | 0.3102207893 | 0.5117771161 |
| C | 0.4759530492 | 0.6898153212 | 0.4882167332 |
| C | 0.4759979298 | 0.8105776948 | 0.9882136566 |
| C | 0.5240417631 | 0.1894340911 | 0.0118400421 |
| C | 0.4242920935 | 0.2300468519 | 0.4808548999 |
| C | 0.5756739721 | 0.7699770869 | 0.5191723922 |
| C | 0.5758173054 | 0.7304810362 | 0.0191581700 |
| C | 0.4242848361 | 0.2695378043 | 0.9808599069 |
| C | 0.4551817810 | 0.1372928015 | 0.5163980719 |
| C | 0.5448334425 | 0.8627355376 | 0.4836275016 |
| C | 0.5449815908 | 0.6376792333 | 0.9836982847 |
| C | 0.4551669660 | 0.3623503213 | 0.0163039477 |
| C | 0.5878456333 | 0.1203165265 | 0.5843203228 |
| C | 0.4122419290 | 0.8797195108 | 0.4156670100 |

|   |              |              |              |
|---|--------------|--------------|--------------|
| C | 0.4122464585 | 0.6205367112 | 0.9158378894 |
| C | 0.5878817229 | 0.3794704205 | 0.0841709065 |
| C | 0.6915017101 | 0.1969937143 | 0.6137516036 |
| C | 0.3085901417 | 0.8030502041 | 0.3861970831 |
| C | 0.3084926645 | 0.6971063205 | 0.8863808271 |
| C | 0.6915782452 | 0.3028709745 | 0.1136651968 |
| C | 0.6639143008 | 0.2912042660 | 0.5774776097 |
| C | 0.3361104113 | 0.7088439687 | 0.4224834531 |
| C | 0.3360509132 | 0.7913727166 | 0.9225641526 |
| C | 0.6639787317 | 0.2086055729 | 0.0774987276 |
| C | 0.7776792493 | 0.3683198468 | 0.6077017939 |
| C | 0.2223122881 | 0.6317499533 | 0.3922458597 |
| C | 0.2222057134 | 0.8683698174 | 0.8923076242 |
| C | 0.7777475904 | 0.1315585966 | 0.1077862906 |
| C | 0.9799234941 | 0.4489001340 | 0.6874175691 |
| C | 0.0200707598 | 0.5511788001 | 0.3125366545 |
| C | 0.0200598129 | 0.9489015849 | 0.8125406071 |
| C | 0.9798991361 | 0.0510220042 | 0.1875286769 |
| C | 0.1121528317 | 0.4764213469 | 0.7607679797 |
| C | 0.8878626815 | 0.5236277373 | 0.2391886791 |
| C | 0.8879805228 | 0.9764462445 | 0.7391377196 |
| C | 0.1120426627 | 0.0234871581 | 0.2609016466 |

## BS3

bfgs converged in 154 scf cycles and 148 bfgs steps

(criteria: energy < 1.0E-04 Ry, force < 1.0E-05Ry/Bohr, cell < 5.0E-01kbar)

End of BFGS Geometry Optimization

Final enthalpy = -4090.8505393184 Ry

Begin final coordinates

new unit-cell volume = 12747.65955 a.u.^3 ( 1889.00823 Ang^3 )

density = 1.83196 g/cm^3

CELL\_PARAMETERS (angstrom)

|              |              |              |
|--------------|--------------|--------------|
| 8.812622629  | 0.002061708  | 0.037306259  |
| 0.003066045  | 13.644959483 | 0.000778059  |
| -4.338938714 | -0.000182728 | 15.690918198 |

ATOMIC\_POSITIONS (crystal)

|     |              |              |              |
|-----|--------------|--------------|--------------|
| Co1 | 0.6415864439 | 0.5022047177 | 0.4558108070 |
| Co2 | 0.3584441498 | 0.4977618218 | 0.5441769432 |
| Co1 | 0.3593114907 | 0.0025833474 | 0.0439005323 |
| Co1 | 0.6406826591 | 0.9974319982 | 0.9560958834 |

|     |              |              |              |
|-----|--------------|--------------|--------------|
| Co1 | 0.9942613473 | 0.6353765203 | 0.5933914673 |
| Co2 | 0.0057693752 | 0.3646002130 | 0.4066141175 |
| Co1 | 0.0052835935 | 0.1353062844 | 0.9069445545 |
| Co1 | 0.9947345192 | 0.8647248459 | 0.0930622427 |
| Cl  | 0.9152637547 | 0.7192380919 | 0.6935629478 |
| Cl  | 0.0847247697 | 0.2807725220 | 0.3064089590 |
| Cl  | 0.0849011285 | 0.2192847584 | 0.8068037527 |
| Cl  | 0.9151329397 | 0.7806541890 | 0.1931530548 |
| Cl  | 0.2576714930 | 0.6432505556 | 0.6231153422 |
| Cl  | 0.7423436654 | 0.3567373404 | 0.3769032849 |
| Cl  | 0.7416928752 | 0.1440605018 | 0.8760688791 |
| Cl  | 0.2583218771 | 0.8559596292 | 0.1239390459 |
| O   | 0.4830909679 | 0.4004113063 | 0.4812807885 |
| O   | 0.5169145513 | 0.5995663735 | 0.5187090264 |
| O   | 0.5167632575 | 0.9000013836 | 0.0189775305 |
| O   | 0.4832256875 | 0.1000133638 | 0.9810204572 |
| N   | 0.5119546804 | 0.5396677756 | 0.3300939605 |
| N   | 0.4880610498 | 0.4603101370 | 0.6699045008 |
| N   | 0.4889339754 | 0.0397803184 | 0.1698108335 |
| N   | 0.5110578079 | 0.9602333080 | 0.8301910266 |
| N   | 0.7694270697 | 0.6171288429 | 0.4288269263 |
| N   | 0.2305853173 | 0.3828532631 | 0.5711802308 |
| N   | 0.2309130887 | 0.1171183829 | 0.0712657922 |
| N   | 0.7690781095 | 0.8828993061 | 0.9287403334 |
| N   | 0.8840790284 | 0.6743219967 | 0.4770706290 |
| N   | 0.1159267874 | 0.3256590450 | 0.5229348089 |
| N   | 0.1160465689 | 0.1743340334 | 0.0230933134 |
| N   | 0.8839446972 | 0.8256901567 | 0.9769106311 |
| N   | 0.7921736900 | 0.4523959213 | 0.5683480479 |
| N   | 0.2078413117 | 0.5475863811 | 0.4316542579 |
| N   | 0.2078214199 | 0.9523695785 | 0.9317582470 |
| N   | 0.7921586889 | 0.0476433131 | 0.0682464888 |
| N   | 0.9198259707 | 0.5018937899 | 0.6178981704 |
| N   | 0.0801791694 | 0.4980888878 | 0.3821117932 |
| N   | 0.0800728977 | 0.0019085264 | 0.8822052761 |
| N   | 0.9199071454 | 0.9981045704 | 0.1178041087 |
| N   | 0.8932992742 | 0.3660674767 | 0.6825098551 |
| N   | 0.1066802768 | 0.6339195789 | 0.3175009041 |
| N   | 0.1065201368 | 0.8660057775 | 0.8176765297 |
| N   | 0.8934746682 | 0.1340194998 | 0.1823193477 |
| H   | 0.9238470992 | 0.3093278475 | 0.7262534877 |
| H   | 0.0761293511 | 0.6906570995 | 0.2737517489 |
| H   | 0.0759443088 | 0.8092560349 | 0.7739612971 |
| H   | 0.9240667758 | 0.1907750041 | 0.2260306680 |

|   |              |              |              |
|---|--------------|--------------|--------------|
| H | 0.3528510971 | 0.4254828730 | 0.3095553325 |
| H | 0.6471434091 | 0.5745058231 | 0.6904406564 |
| H | 0.6480748112 | 0.9255043175 | 0.1903860791 |
| H | 0.3519049338 | 0.0745037355 | 0.8096148522 |
| H | 0.2228837028 | 0.4749708402 | 0.1579651787 |
| H | 0.7770832687 | 0.5250455693 | 0.8420429259 |
| H | 0.7776264845 | 0.9747436968 | 0.3420527806 |
| H | 0.2223470104 | 0.0252546940 | 0.6579528298 |
| H | 0.3226637607 | 0.6255279364 | 0.0989968399 |
| H | 0.6773376921 | 0.3744755502 | 0.9010119255 |
| H | 0.6776553968 | 0.1252435522 | 0.4010762763 |
| H | 0.3223395410 | 0.8747641936 | 0.5989271453 |
| H | 0.5451227579 | 0.7186833064 | 0.1913803389 |
| H | 0.4549090365 | 0.2812964559 | 0.8086222062 |
| H | 0.4552296611 | 0.2185610219 | 0.3086609649 |
| H | 0.5447808740 | 0.7814567702 | 0.6913397385 |
| H | 0.7418192453 | 0.8164559195 | 0.3114139220 |
| H | 0.2582320406 | 0.1835124837 | 0.6885811437 |
| H | 0.2590457396 | 0.3166181220 | 0.1884947526 |
| H | 0.7409875138 | 0.6834094481 | 0.8115015998 |
| H | 0.1079413430 | 0.8120205981 | 0.5140783554 |
| H | 0.8920835886 | 0.1879583228 | 0.4859194451 |
| H | 0.8923409567 | 0.3121503487 | 0.9859861515 |
| H | 0.1076761996 | 0.6878788451 | 0.0140094573 |
| H | 0.9440107616 | 0.8842679180 | 0.5215313852 |
| H | 0.0560164863 | 0.1157102675 | 0.4784743237 |
| H | 0.0562158853 | 0.3844024512 | 0.9786332934 |
| H | 0.9438087079 | 0.6156233674 | 0.0213677842 |
| H | 0.0180463260 | 0.8928675237 | 0.4298175022 |
| H | 0.9819644720 | 0.1071112470 | 0.5701821579 |
| H | 0.9820669059 | 0.3929242704 | 0.0703158869 |
| H | 0.0179428314 | 0.6071080725 | 0.9296791674 |
| H | 0.3193547865 | 0.2443008138 | 0.4295182584 |
| H | 0.6806475243 | 0.7556860549 | 0.5704759738 |
| H | 0.6805408666 | 0.7438337268 | 0.0705216788 |
| H | 0.3194422865 | 0.2561776460 | 0.9294720431 |
| H | 0.3740737774 | 0.0775340719 | 0.4918358348 |
| H | 0.6259230307 | 0.9224498279 | 0.5081550864 |
| H | 0.6258700466 | 0.5771603848 | 0.0080298850 |
| H | 0.3741183223 | 0.4228568814 | 0.9919547822 |
| H | 0.6091716761 | 0.0483556856 | 0.6137861794 |
| H | 0.3908154207 | 0.9516252116 | 0.3862064421 |
| H | 0.3908301118 | 0.5482372660 | 0.8860270023 |
| H | 0.6091659087 | 0.4517869982 | 0.1139514092 |



|   |              |              |              |
|---|--------------|--------------|--------------|
| H | 0.7965530579 | 0.1839150625 | 0.6656808154 |
| H | 0.2034466918 | 0.8160575697 | 0.3343106672 |
| H | 0.2034002959 | 0.6839086103 | 0.8342714275 |
| H | 0.7965954678 | 0.3161162558 | 0.1657104397 |
| H | 0.1931214845 | 0.5252655513 | 0.7396667539 |
| H | 0.8068804262 | 0.4747023538 | 0.2603532887 |
| H | 0.8068147692 | 0.0254995260 | 0.7604572701 |
| H | 0.1931667872 | 0.9745157508 | 0.2395519229 |
| H | 0.1737112987 | 0.4112657946 | 0.7912286786 |
| H | 0.8262533392 | 0.5887094945 | 0.2087940879 |
| H | 0.8258737988 | 0.9112916457 | 0.7090850765 |
| H | 0.1741127744 | 0.0887248966 | 0.2909225901 |
| H | 0.0660881822 | 0.5165501188 | 0.8083037454 |
| H | 0.9338986958 | 0.4834403480 | 0.1917105744 |
| H | 0.9336507254 | 0.0163095557 | 0.6917391446 |
| H | 0.0663247144 | 0.9837111061 | 0.3082662775 |
| C | 0.3919574812 | 0.4893131170 | 0.2800423819 |
| C | 0.6080419983 | 0.5106766634 | 0.7199572279 |
| C | 0.6088561467 | 0.9893209519 | 0.2198948879 |
| C | 0.3911288048 | 0.0106876235 | 0.7801065328 |
| C | 0.3200155784 | 0.5176304985 | 0.1966602115 |
| C | 0.6799701947 | 0.4823726173 | 0.8033453439 |
| C | 0.6805897357 | 0.0175077632 | 0.3033315943 |
| C | 0.3193932686 | 0.9824975389 | 0.6966725372 |
| C | 0.3749493592 | 0.6011877841 | 0.1640390806 |
| C | 0.6250546071 | 0.3988111321 | 0.8359679528 |
| C | 0.6255504874 | 0.1010391539 | 0.3359812494 |
| C | 0.3744436075 | 0.8989692925 | 0.6640209333 |
| C | 0.4995263520 | 0.6535144755 | 0.2153074499 |
| C | 0.5004934767 | 0.3464701945 | 0.7846969596 |
| C | 0.5010112427 | 0.1534570086 | 0.2846924842 |
| C | 0.4989902334 | 0.8465567571 | 0.7153100656 |
| C | 0.5667858294 | 0.6207362587 | 0.2983585563 |
| C | 0.4332324483 | 0.3792449620 | 0.7016447863 |
| C | 0.4339292856 | 0.1207784866 | 0.2016013917 |
| C | 0.5660653876 | 0.8792343698 | 0.7984012364 |
| C | 0.6992457887 | 0.6675981134 | 0.3572350732 |
| C | 0.3007675954 | 0.3323823250 | 0.6427701498 |
| C | 0.3013473482 | 0.1676596001 | 0.1427541721 |
| C | 0.6986465530 | 0.8323557447 | 0.8572494288 |
| C | 0.7712784316 | 0.7594999303 | 0.3590710990 |
| C | 0.2287405680 | 0.2404767717 | 0.6409323832 |
| C | 0.2293166369 | 0.2595928132 | 0.1409293090 |
| C | 0.7706886000 | 0.7404303059 | 0.8590744857 |

|   |              |              |              |
|---|--------------|--------------|--------------|
| C | 0.8867961896 | 0.7616529707 | 0.4361552618 |
| C | 0.1132194202 | 0.2383265881 | 0.5638494496 |
| C | 0.1135114656 | 0.2617218758 | 0.0639413766 |
| C | 0.8864942058 | 0.7383036091 | 0.9360608171 |
| C | 0.9947119436 | 0.8420562275 | 0.4773436867 |
| C | 0.0053086249 | 0.1579228335 | 0.5226586295 |
| C | 0.0055077111 | 0.3421552249 | 0.0227770181 |
| C | 0.9945079274 | 0.6578732547 | 0.9772221217 |
| C | 0.5239493406 | 0.3105707541 | 0.5119111019 |
| C | 0.4760552736 | 0.6894076560 | 0.4880839862 |
| C | 0.4758942063 | 0.8102311401 | 0.9881889989 |
| C | 0.5240915115 | 0.1897850916 | 0.0118062517 |
| C | 0.4243161731 | 0.2303870346 | 0.4809832741 |
| C | 0.5756849092 | 0.7695957108 | 0.5190111176 |
| C | 0.5755743193 | 0.7300077329 | 0.0190491224 |
| C | 0.4244089632 | 0.2700059132 | 0.9809445249 |
| C | 0.4552706841 | 0.1375792121 | 0.5164395902 |
| C | 0.5447253366 | 0.8624031140 | 0.4835539494 |
| C | 0.5446525992 | 0.6372604274 | 0.9834888980 |
| C | 0.4553334938 | 0.3627575527 | 0.0164984925 |
| C | 0.5879594289 | 0.1205153373 | 0.5842853406 |
| C | 0.4120337098 | 0.8794661470 | 0.4157088919 |
| C | 0.4120034100 | 0.6203399298 | 0.9156108537 |
| C | 0.5879888845 | 0.3796808350 | 0.0843723671 |
| C | 0.6915378524 | 0.1971725707 | 0.6137333561 |
| C | 0.3084612193 | 0.8028070421 | 0.3862618007 |
| C | 0.3084058344 | 0.6970748178 | 0.8862335989 |
| C | 0.6915858326 | 0.3029482530 | 0.1137518992 |
| C | 0.6638676963 | 0.2914453575 | 0.5775561266 |
| C | 0.3361353655 | 0.7085361737 | 0.4224399232 |
| C | 0.3360228885 | 0.7912737304 | 0.9225235961 |
| C | 0.6639657818 | 0.2087443536 | 0.0774691200 |
| C | 0.7775664488 | 0.3685245612 | 0.6077994408 |
| C | 0.2224337405 | 0.6314588738 | 0.3922029027 |
| C | 0.2223158525 | 0.8684424296 | 0.8923456668 |
| C | 0.7776743485 | 0.1315762240 | 0.1076516633 |
| C | 0.9795500465 | 0.4491674437 | 0.6875054147 |
| C | 0.0204380865 | 0.5508179910 | 0.3125098361 |
| C | 0.0202775960 | 0.9491708121 | 0.8126489895 |
| C | 0.9797094630 | 0.0508496735 | 0.1873551489 |
| C | 0.1115190191 | 0.4768312225 | 0.7608520183 |
| C | 0.8884647132 | 0.5231483799 | 0.2391663993 |
| C | 0.8882428591 | 0.9768378069 | 0.7393129483 |
| C | 0.1117389247 | 0.0231805185 | 0.2606934837 |
