# Supplementary material for: Magnetic relaxation in a Co(ii) chain complex: synthesis, structure, and DFT computational coupling constant
Source: Royal Society of Chemistry journal article supplement (doi:10.1039/d0ce01662d), 2021-01-01
Supplement: d0ce01662d2.pdf [file d0ce01662d2.pdf]

# Magnetic relaxation in a Co(II) chain complex: synthesis, structure, and DFT computational coupling constant

Wen-Hao Wu,<sup>a</sup> Ya-Qun Wang,<sup>a</sup> Hong-Li Mi,<sup>a</sup> Qing-Xuan Xue,<sup>a</sup> Feng Shao,<sup>c</sup> Fei Shen<sup>\*b</sup> and Feng-Lei Yang<sup>\*a,c</sup>

*a* School of Chemistry and Material Science and Jiangsu Key Laboratory of Green Synthetic Chemistry for Functional Materials, Jiangsu Normal University, Xuzhou, Jiangsu 221116, P. R. China  
E-mail: yangfl@jsnu.edu.cn; doctorfly@yeah.net;

*b* College of Physical Education and Health & Education Ministry Key Laboratory of Adolescent Health Assessment and Exercise Intervention of Ministry of Education, East China Normal University, Shanghai 200241, P. R. China

*c* Institut de Chimie Moléculaire et des Matériaux d'Orsay, CNRS, Université Paris-Sud, Université Paris-Saclay, 91405 Orsay Cedex, France

## Contents

|                                                                                                                                                                                                                               |   |
|-------------------------------------------------------------------------------------------------------------------------------------------------------------------------------------------------------------------------------|---|
| <b>Structure description</b> .....                                                                                                                                                                                            | 2 |
| Fig. S1. FT-IR spectra of <b>1</b> at room temperature. ....                                                                                                                                                                  | 2 |
| Fig. S2. XRD of <b>1</b> at room temperature. ....                                                                                                                                                                            | 3 |
| Table S1. Hydrogen bonds for <b>1</b> [Å and °]. ....                                                                                                                                                                         | 3 |
| <b>Fig S3</b> The TGA (left) and UV-Vis spectrum (right) of <b>1</b> . ....                                                                                                                                                   | 3 |
| <b>Simulation of Coupling constant from <math>\chi_M T</math> vs. <math>T</math> curve in detail (alternative dinuclear-Co2 chain model without considering magnetic anisotropy, using software Origin):</b> .....            | 3 |
| 1. Deduction of the $J$ (coupling constant) unit.....                                                                                                                                                                         | 3 |
| 2. $\chi_d$ (molar magnetic susceptibility of Co2 dimer): .....                                                                                                                                                               | 4 |
| 3. For alternative chain by Rojo formula (Inorg. Chem. 1997, 36, 677).....                                                                                                                                                    | 4 |
| 4. For alternative chain of Co(II) dimer in our system: .....                                                                                                                                                                 | 4 |
| 5. The function file for fitting in OriginPro2021 with the $J$ unit in $\text{cm}^{-1}$ , in two column.....                                                                                                                  | 4 |
| <b>Simulation of Coupling constant from <math>\chi_M T</math> vs. <math>T</math> curve using software Magpack<sup>1</sup>(ring model of chain compound considering magnetic anisotropy):</b> .....                            | 5 |
| <b>Scheme S1.</b> The ring-model of the chain compounds to calculate the coupling constant using the software Magpack. ....                                                                                                   | 5 |
| The Spin Hamiltonian Equation of ring-model of the chain compound (Scheme S1) as follows: .....                                                                                                                               | 6 |
| <b>Fig S4</b> The best fit of $\chi_M T$ vs. $T$ curve using software Magpack (the black square is the experimental $\chi_M T$ vs. $T$ curve and the red solid line is the best fit by the ring-model of chain compound)..... | 6 |
| <b>The input files of parani21</b> .....                                                                                                                                                                                      | 6 |

|                                                                                                                                                                                                                                                                                                                                                                                                                                            |    |
|--------------------------------------------------------------------------------------------------------------------------------------------------------------------------------------------------------------------------------------------------------------------------------------------------------------------------------------------------------------------------------------------------------------------------------------------|----|
| <b>The input files of parani22</b> .....                                                                                                                                                                                                                                                                                                                                                                                                   | 7  |
| <b>DFT calculations on the magnetic coupling constants</b> .....                                                                                                                                                                                                                                                                                                                                                                           | 9  |
| <b>Fig. S5.</b> The spin configurations of the two tetramers in one lattice unit cell, the direction of the arrows representing the spin orientation: a) all the spins up in the high-spin state (HS); b) only the spin of Co5 down in the first broken-symmetry state (BS1); c) only the spin of Co4 down in the second broken-symmetry state (BS2); d) only the spin of Co2 and Co6 down in the third broken-symmetry state (BS3), ..... | 10 |
| Table S2. DFT calculation results for the molecules in one unit cell .....                                                                                                                                                                                                                                                                                                                                                                 | 11 |
| <b>Fig. S6.</b> Evolution of $\Delta H_{elec}$ with $U$ for (left) Fe <sup>II</sup> and (right) Fe <sup>III</sup> compounds (copied from ref. 7). .....                                                                                                                                                                                                                                                                                    | 12 |
| Fig. S7 Isothermal field-dependence of the magnetization per Co2 at multiple temperatures for <b>1a</b> . .....                                                                                                                                                                                                                                                                                                                            | 12 |
| <b>Dynamic magnetic properties</b> .....                                                                                                                                                                                                                                                                                                                                                                                                   | 13 |
| <b>Fig. S8.</b> The Cole-Cole plots of <b>1a</b> at various temperatures, red lines are the best fits. ....                                                                                                                                                                                                                                                                                                                                | 13 |
| Table S3 The $\alpha$ values from the fitting of the Cole-Cole plots of Fig. S8 .....                                                                                                                                                                                                                                                                                                                                                      | 13 |
| References .....                                                                                                                                                                                                                                                                                                                                                                                                                           | 13 |

## Structure description

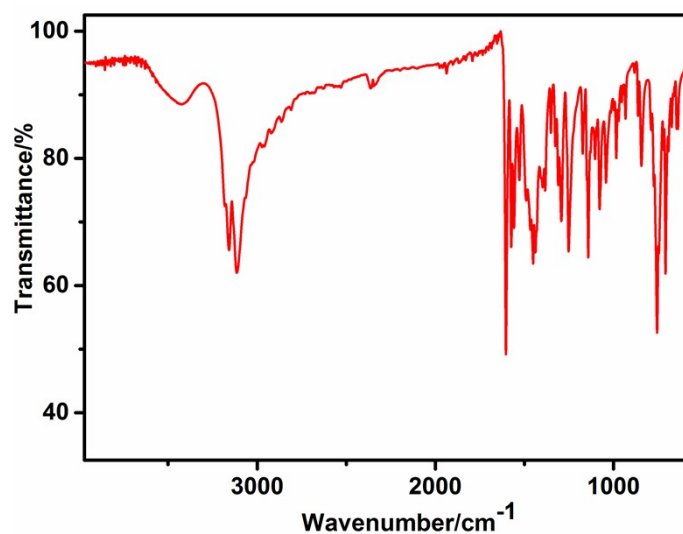

Fig. S1. FT-IR spectra of **1** at room temperature.

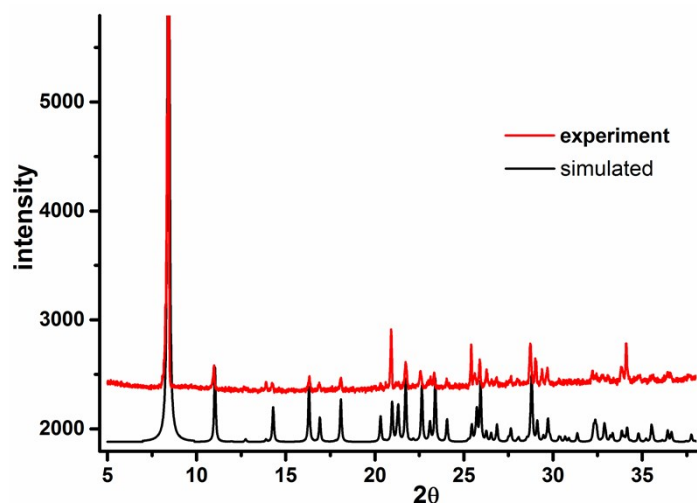

Fig. S2. XRD of **1** at room temperature.

Table S1. Hydrogen bonds for **1** [Å and °].

| D-H···A                           | d(D-H) | d(H···A) | d(D···A)   | <(DHA) |
|-----------------------------------|--------|----------|------------|--------|
| C(14)-H(14A)···N(6)               | 0.93   | 2.62     | 2.932(2)   | 100.5  |
| C(18)-H(18A)···Cl(2)              | 0.96   | 2.78     | 3.659(2)   | 152.7  |
| C(11)-H(11A)···Cl(1) <sup>a</sup> | 0.93   | 2.84     | 3.7659(17) | 177.2  |
| C(18)-H(18B)···Cl(1) <sup>b</sup> | 0.96   | 2.91     | 3.651(2)   | 134.5  |
| N(6)-H(6A)···Cl(1) <sup>b</sup>   | 0.86   | 2.3      | 3.0888(13) | 151.9  |

Symmetry code: <sup>a</sup> -x+1, -y+1, -z+1 <sup>c</sup> -x+2, y-1/2, -z+3/2

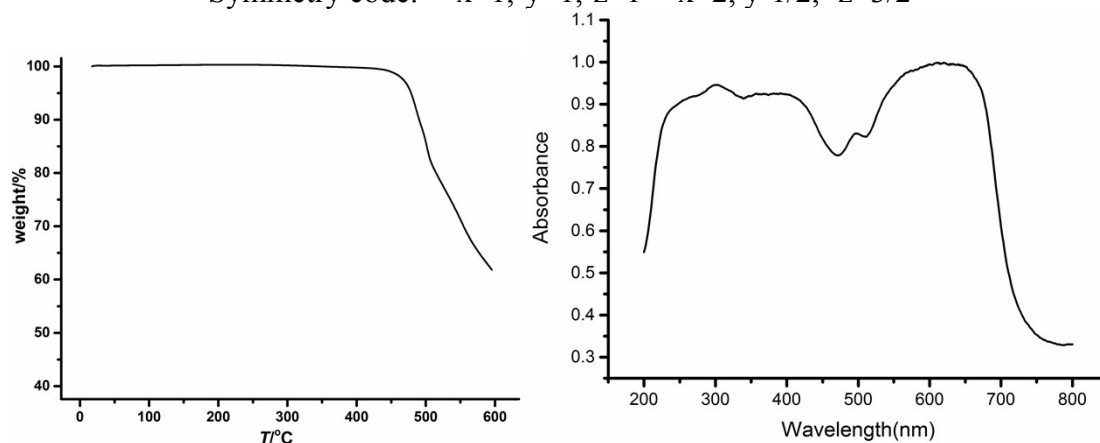

Fig S3 The TGA (left) and UV-Vis spectrum (right) of **1**.

**Simulation of Coupling constant from  $\chi_M T$  vs.  $T$  curve in detail (alternative dinuclear- $\text{Co}_2$  chain model without considering magnetic anisotropy, using software Origin):**

1. Deduction of the  $J$  (coupling constant) unit

$k$  or  $k_B$  is Boltzmann constant,  $k = 1.3806503 \times 10^{-23}$  J/K

$1 \text{ cm}^{-1} = 1.986 \times 10^{-23} \text{ J} = 1.441 \text{ K}$

So,  $k = 1.3806503 \times 10^{-23} \text{ J/K} = 1.3806503 \times 10^{-23} / (1.986 \times 10^{-23}) \text{ cm}^{-1}/\text{K} = 0.69519149 \text{ cm}^{-1}/\text{K}$

If  $1/k=1.441 \text{ K/cm}^{-1}$ , the unit of  $J$  is  $\text{cm}^{-1}$

If  $1/k=1.441 \text{ K/cm}^{-1}=1 \text{ cm}^{-1}/\text{cm}^{-1}=1$ , the unit of  $J$  is K

2.  $\chi_d$  (molar magnetic susceptibility of Co2 dimer):

$$\chi_d = \frac{Ng^2\beta^2}{3kT} S_d(S_d+1)$$

$$S_d(S_d+1) = 6 \times \frac{\exp(2J_d/kT) + 5\exp(6J_d/kT) + 14\exp(12J_d/kT)}{1 + 3\exp(2J_d/kT) + 5\exp(6J_d/kT) + 7\exp(12J_d/kT)} = \frac{\sum S_d(S_d+1)(2S_d+1)\exp(-E_d/kT)}{\sum (2S_d+1)\exp(-E_d/kT)}$$

$$\chi_d = \frac{2Ng^2\beta^2}{kT} \frac{\exp(2J_d/kT) + 5\exp(6J_d/kT) + 14\exp(12J_d/kT)}{1 + 3\exp(2J_d/kT) + 5\exp(6J_d/kT) + 7\exp(12J_d/kT)}$$

3. For alternative chain by Rojo formula (Inorg. Chem. 1997, 36, 677)

$$\chi = \frac{Ng^2\beta^2}{3kT} \frac{1+u_1+u_2+u_1u_2}{1-u_1u_2} S(S+1)$$

$$u_1 = \coth[J_1S(S+1)/kT] - kT/J_1S(S+1), u_2 = \coth[J_2S(S+1)/kT] - kT/J_2S(S+1)$$

4. For alternative chain of Co(II) dimer in our system:

we can get the following equation:

$$\chi = \frac{Ng^2\beta^2}{3kT} \frac{1+u_1+u_2+u_1u_2}{1-u_1u_2} S_d(S_d+1)$$

$$S_d(S_d+1) = 6 \times \frac{\exp(2J_1/kT) + 5\exp(6J_1/kT) + 14\exp(12J_1/kT)}{1 + 3\exp(2J_1/kT) + 5\exp(6J_1/kT) + 7\exp(12J_1/kT)}$$

$$u_1 = \coth[J_2S_d(S_d+1)/kT] - kT/J_2S_d(S_d+1), u_2 = \coth[J_3S_d(S_d+1)/kT] - kT/J_3S_d(S_d+1)$$

5. The function file for fitting in OriginPro2021 with the  $J$  unit in  $\text{cm}^{-1}$ , in two column

| [General Information]               | [Fitting Parameters]            |
|-------------------------------------|---------------------------------|
| Function Name = Co2alternativechain | Names = J2,g,J3,J1,zJ,Theta,TIP |
| Brief Description =                 | Initial Values = --(V)          |
| Function Source = N/A               | Meanings = ?                    |
| Number Of Parameters = 7            | Lower Bounds = --(X, OFF)       |
| Function Type = User-Defined        | Upper Bounds = --(X, OFF)       |
| Function Form = Equations           | Naming Method = User-Defined    |
| Path =                              | Number Of Significant Digits =  |
| Number Of Independent Variables = 1 | Unit =                          |
| Number Of Dependent Variables = 1   | [Independent Variables]         |
| FunctionPrev = NewFunction1         | T =                             |

|                                                                                                               |                                                    |
|---------------------------------------------------------------------------------------------------------------|----------------------------------------------------|
| [Dependent Variables]                                                                                         | Initialization Scripts = 0                         |
| ChimT =                                                                                                       | Scripts After Fitting = 0                          |
| [Formula]                                                                                                     | Number Of Duplicates = N/A                         |
| double k=0.69503887;                                                                                          | Duplicate Offset = N/A                             |
| double NB2=0.260727165;                                                                                       | Duplicate Unit = N/A                               |
| double x=1/(k*T);                                                                                             | Generate Curves After Fitting = 1                  |
| double u1,u2;                                                                                                 | Curve Point Spacing = Uniform on X-Axis Scale      |
| double<br>temp3=6*(exp(2*x*J1)+5*exp(6*x*J1)+14*exp(12*x*J1))/(1+3*exp(2*x*J1)+5*exp(6*x*J1)+7*exp(12*x*J1)); | Generate Peaks After Fitting = 1                   |
| u1=cosh(x*J2*temp3)/sin(x*J2*temp3)-1/(x*J2*temp3);                                                           | Generate Peaks During Fitting = 1                  |
| u2=cosh(x*J3*temp3)/sin(x*J3*temp3)-1/(x*J3*temp3);                                                           | Generate Peaks with Baseline = 1                   |
| double chi=0.125*g*g*(1+u1+u2+u1*u2)/(1-u1*u2)*temp3/(T-Theta);                                               | Paste Parameters to Plot After Fitting = 1         |
| double chid=1/chi-2.0*zJ/(NB2*g^2);                                                                           | Paste Parameters to Notes Window After Fitting = 1 |
| ChimT=T*(1/chid+TIP);;                                                                                        | Generate Residuals After Fitting = 0               |
| [Initializations]                                                                                             | Keep Parameters = 0                                |
| [After Fitting]                                                                                               | Compile On Param Change Script = 1                 |
| [Controls]                                                                                                    | Enable Parameters Initialization = 1               |
| General Linear Constraints = 0                                                                                | [Compile Function]                                 |
|                                                                                                               | Compile = 1                                        |
|                                                                                                               | Compile Parameters Initialization = 1              |
|                                                                                                               | OnParamChangeScriptsEnabled = 0.                   |

**Simulation of Coupling constant from  $\chi_M T$  vs.  $T$  curve using software Magpack<sup>1</sup>(ring model of chain compound considering magnetic anisotropy):**

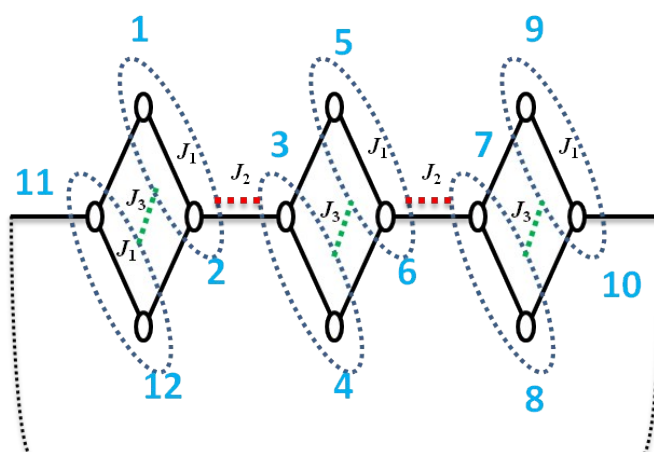

**Scheme S1.** The ring-model of the chain compounds to calculate the coupling constant using the software Magpack.<sup>1</sup>

The Spin Hamiltonian Equation of ring-model of the chain compound  
(Scheme S1) as follows :

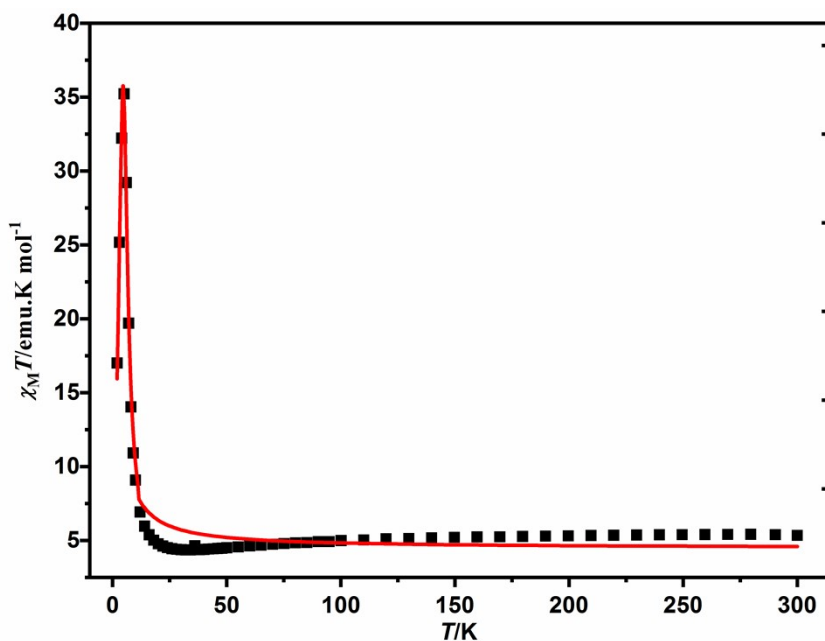

$$\begin{aligned}
 H = & -2J_1 \left( \vec{S}_1 \vec{S}_2 + \vec{S}_2 \vec{S}_4 + \vec{S}_5 \vec{S}_6 + \vec{S}_7 \vec{S}_8 + \vec{S}_9 \vec{S}_{10} + \vec{S}_{11} \vec{S}_{12} \right) \\
 & - 2J_2 \left( \vec{S}_2 \vec{S}_3 + \vec{S}_6 \vec{S}_7 + \vec{S}_{10} \vec{S}_{11} \right) - 2J_3 \left( \vec{S}_4 \vec{S}_5 + \vec{S}_8 \vec{S}_9 + \vec{S}_{12} \vec{S}_1 \right) \\
 & - 2J_x \left( \sum_{i=1}^{11} \vec{S}_i^x \vec{S}_{i+1}^x + \vec{S}_{12}^x \vec{S}_1^x \right) - 2J_y \left( \sum_{i=1}^{11} \vec{S}_i^y \vec{S}_{i+1}^y + \vec{S}_{12}^y \vec{S}_1^y \right) \\
 & - 2J_z \left( \sum_{i=1}^{11} \vec{S}_i^z \vec{S}_{i+1}^z + \vec{S}_{12}^z \vec{S}_1^z \right) \\
 & + \mu_B H_z \left[ g_{z1} \left( \vec{S}_1^z + \vec{S}_4^z + \vec{S}_5^z + \vec{S}_8^z + \vec{S}_9^z + \vec{S}_{12}^z \right) \right. \\
 & \left. + g_{z2} \left( \vec{S}_2^z + \vec{S}_3^z + \vec{S}_6^z + \vec{S}_7^z + \vec{S}_{10}^z + \vec{S}_{11}^z \right) \right] + D \sum_{i=1}^{12} \left( \vec{S}_i^z \right)^2
 \end{aligned}$$

**Fig S4** The best fit of  $\chi_M T$  vs.  $T$  curve using software Magpack<sup>1</sup> (the black square is the experimental  $\chi_M T$  vs.  $T$  curve and the red solid line is the best fit by the ring-model of chain compound)

**The input files of parani21**  
 PARAMETER (NUM=12) ! number  
 of centers (<=14)  
 C

PARAMETER (IDTOT = 1703636) !  
 dimension of full energy matrix  
 PARAMETER (IDTOTF= 1) ! [If  
 IEIG=2 then IDTOTF=IDTOT; else =1]  
 C

PARAMETER (IUNI=2) ! units (1=K,  
2=meV, 3=cm-1)

C

PARAMETER (IISO=1) ! isotropic  
exchange [1(yes)/0(no)]

C

PARAMETER (IANL=1) ! local  
anisotropy [1(yes)/0(no)]

C

PARAMETER (IANI=0) !  
anisotropic exchange [1(yes)/0(no)]

C

PARAMETER (ISUS=1) ! Magnetic  
susceptibility

C

PARAMETER (ICAL=0) ! Specific  
heat

C

PARAMETER (IMAG=1) !  
Magnetization

C

PARAMETER (ISPI=0) ! write the  
base functions [1(yes)/0(no)]

C

PARAMETER (IEIG=0) ! write  
eigenvalues

C

[no(0)/yes(1)/yes+eigenvect(2)]

C

C

C-----

C\* The following parameter is defined to  
minimize underflow problems

PARAMETER (EPS = 1.D-12)

### The input files of parani22

C\*\* SPIN OF EACH CENTER.  
ISN(I)=2S; I<=14

C

ISN(1) = 3

ISN(2) = 3

ISN(3) = 3

ISN(4) = 3

ISN(5) = 3

ISN(6) = 3

ISN(7) = 3

ISN(8) = 3

ISN(9) = 3

ISN(10)= 3

ISN(11)= 3

ISN(12)= 3

ISN(13)= 0

ISN(14)= 0

C

C\*\*\*\* NON ZERO EXCHANGE  
PARAMETERS BETWEEN CENTERS I  
AND J (I<J)

C\*\* ISOTROPIC EXCHANGE  
PARAMETERS: CONEX(I,J,1) = K

C

CONEX(1,2,1)= 0.15D0

CONEX(2,3,1)= 6.15D0

CONEX(3,4,1)= 0.15D0

CONEX(4,5,1)= 0.100D0

CONEX(5,6,1)= 0.15D0

CONEX(6,7,1)= 6.15D0

CONEX(7,8,1)= 0.15D0

CONEX(8,9,1)= 0.100D0

CONEX(9,10,1)= 0.15D0

CONEX(10,11,1)= 6.15D0

CONEX(11,12,1)= 0.15D0

CONEX(12,1,1)= 0.10D0

C

C\*\* BIQUADRATIC EXCHANGE  
PARAMETERS: CONEX(I,J,2) = K

C

CONEX(1,2,2)= 0.0D0

C

C\*\* ANISOTROPIC EXCHANGE  
PARAMETERS:

C CONEX (I,J,3)=JX, CONEX  
(I,J,4)=JY, CONEX (I,J,5)=JZ

C

CONEX(1,2,3)= -0.10D0

CONEX(2,3,3)= -0.1D0

CONEX(3,4,3)= -0.10D0

CONEX(1,2,4)= -0.10D0

CONEX(2,3,4)= -0.1D0

```

CONEX(3,4,4)= -0.10D0
CONEX(1,2,5)= 0.10D0
CONEX(2,3,5)= 0.10D0
CONEX(3,4,5)= 0.10D0
C
C** LOCAL ANISOTROPIC
PARAMETERS:
C
ANILOD(1) = -0.0100D0
ANILOD(2) = -0.5200D0
ANILOD(3) = -0.5200D0
ANILOD(4) = -0.010D0
ANILOD(5) = -0.0100D0
ANILOD(6) = -0.5200D0
ANILOD(7) = -0.5200D0
ANILOD(8) = -0.010D0
ANILOD(9) = -0.0100D0
ANILOD(10) = -0.5200D0
ANILOD(11) = -0.5200D0
ANILOD(12) = -0.010D0
C
ANILOE(1) = 0.00D0
ANILOE(2) = 0.00D0
ANILOE(3) = 0.00D0
ANILOE(4) = 0.00D0
C
C** A-3) G PARAMETERS (GX=GY)
C
GX(1) = 0.0d0
GY(1) = GX(1)
GZ(1) = 2.70d0
GX(2) = 0.0d0
GY(2) = GX(2)
GZ(2) = 3.7d0
GX(3) = 0.0d0
GY(3) = GX(3)
GZ(3) = 3.7d0
GX(4) = 0.0d0
GY(4) = GX(4)
GZ(4) = 2.7d0
GX(5) = 0.0d0
GY(5) = GX(1)
GZ(5) = 2.70d0
GX(6) = 0.0d0
GY(6) = GX(2)
GZ(6) = 3.7d0
GX(7) = 0.0d0
GY(7) = GX(3)
GZ(7) = 3.7d0
GX(8) = 0.0d0
GY(8) = GX(4)
GZ(8) = 2.7d0
GX(9) = 0.0d0
GY(9) = GX(1)
GZ(9) = 2.70d0
GX(10) = 0.0d0
GY(10) = GX(2)
GZ(10) = 3.7d0
GX(11) = 0.0d0
GY(11) = GX(3)
GZ(11) = 3.7d0
GX(12) = 0.0d0
GY(12) = GX(4)
GZ(12) = 2.7d0
C
C
C** MAGNETIZATION
PARAMETERS
C
C ANGLE STEP TO INTEGRATE
OVER ALL DIRECCTONS (DEG)
IANG = 50
C
C MAXIMUM VALUE OF
MAGNETIC FIELD (ICAMMAX/100
TESLAS)
ICAMMAX = 500
C
C STEP IN MAGNETIC FIELD TO
PLOT M VS H (ICAMSTP/100 TESLAS)
ICAMSTP = 20
C
C TEMPERATURE (K)
TEMP = 2.0D0

```



C  
 C SHOW 0=AVERAGED,  
 PAPALLEL AND PERPENDICULAR  
 MAGNETIZATION

C 1=AVERAGED AND ALL  
 CALCULATED CONTRIBUTIONS

ISHOW = 1

C

C

C\*\* SUSCEPTIBILITY

C

C INITIAL TEMPERATURE (K)

TEMP1 = 2.0D0

C

C FINAL TEMPERATURE (K)

TEMP2 = 300.0D0

C

C NUMBER OF POINTS

ISTEPTEMP = 100

C

C MAGNETIC FIELD (CAMPO/100  
 TESLAS)

CAMPO = 10.D0

### DFT calculations on the magnetic coupling constants.

To estimate the exchange coupling constants between the  $\text{Co}^{2+}$  ions, calculations based on the density function theory integrating with the broken-symmetry approach (BS)<sup>2, 3</sup> were carried out for **1**. The initial structure was the periodic model of two tetramers in one lattice unit cell (Fig. S5) extracted from cif file. The exchange coupling constants  $J$  (Table S2) have been evaluated by calculating the energy difference between the high-spin state ( $E_{\text{HS}}$ ) and the broken symmetry state ( $E_{\text{BS}}$ ). The phenomenological spin Hamiltonian is defined as:  $H = -2JS_1 S_2$ . Based on this spin Hamiltonian, the coupling constant  $J$  can be extracted from the following equation:  $J = (E_{\text{BS}} - E_{\text{HS}}) / (4S_1 S_2 + 2S_2)$ . For our system,  $S_1 = S_2 = 3/2$ , thus,  $J = (E_{\text{BS}} - E_{\text{HS}}) / 12$ .

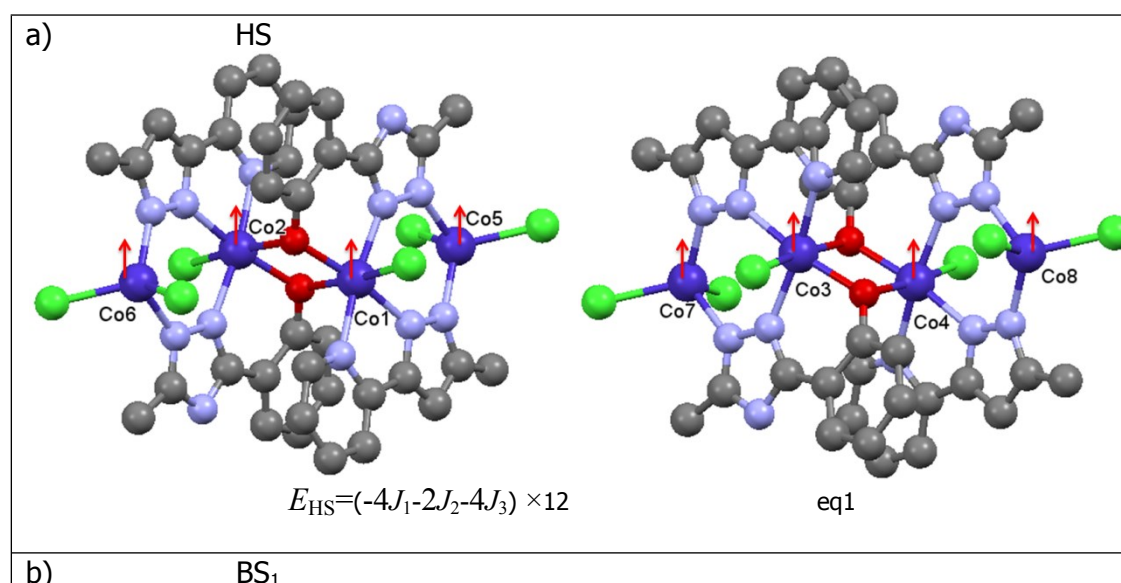

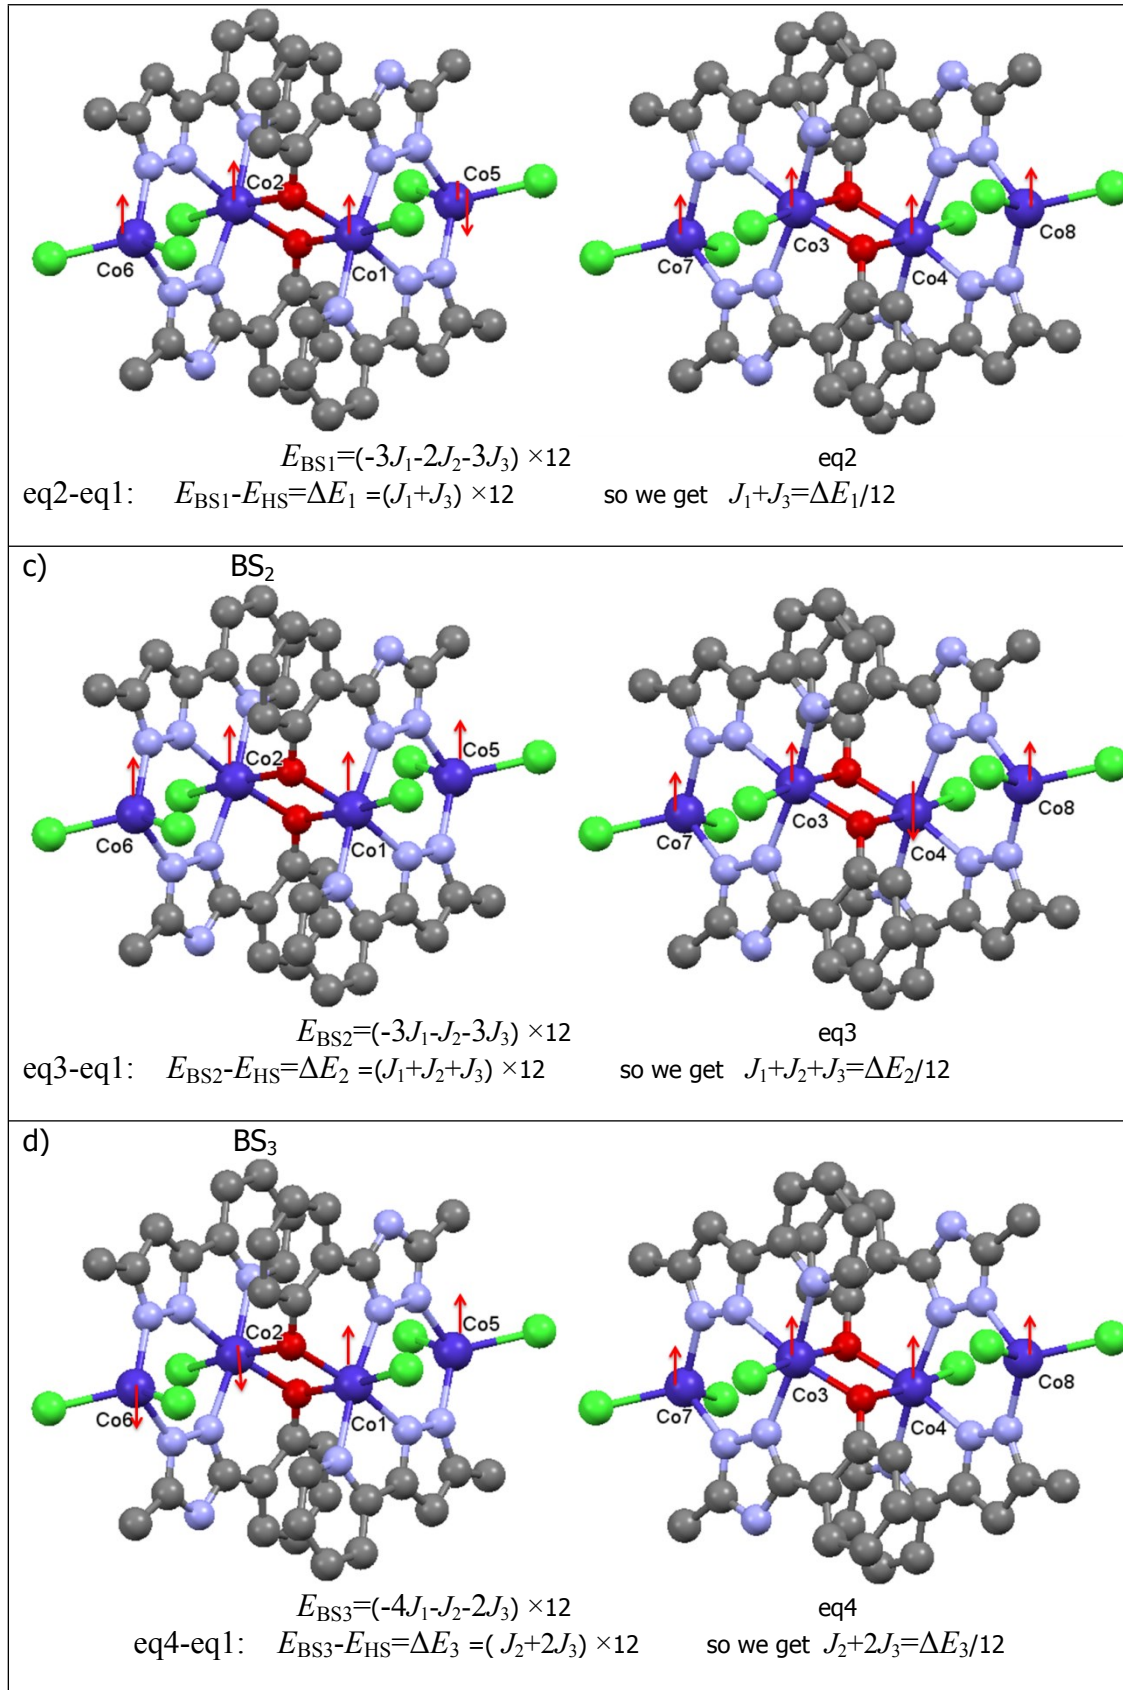

**Fig. S5.** The spin configurations of the two tetramers in one lattice unit cell, the direction of the arrows representing the spin orientation: a) all the spins up in the

high-spin state (HS); b) only the spin of Co5 down in the first broken-symmetry state (BS1); c) only the spin of Co4 down in the second broken-symmetry state (BS2); d) only the spin of Co2 and Co6 down in the third broken-symmetry state (BS3), .

All calculations (including optimizations and energy evaluations) were performed on the Quantum Espresso package (QE) Version 6.5,<sup>4, 5</sup> using the PBE+*U*+D3<sup>6</sup> scheme with *U* =2.29 eV for the d orbitals of cobalt referring to iron.<sup>7</sup> The spin unrestricted formalism, the D3 correction of Grimme, Vanderbilt pseudopotentials,<sup>8</sup> and a  $\Gamma$ -point sampling of the Brillouin zone was set up. The computation of HS and BS state was performed by successive variable-cell geometry relaxations (vc-relax) at the solid-state until the minima were obtained. The lattice parameters and the atomic positions are optimized simultaneously. The convergence criterion was set at atomic forces smaller than  $1 \times 10^{-5}$  atomic units. In these calculations, the number of plane waves was kept constant at a kinetic energy cutoff of 70 and 560 Ry for *ecutwfc* and *ecutrho*, respectively. This large cutoff ensures that artifacts originated in the change of unit-cell volume (i.e., Pulay stress) are negligible. The spin state of the cobalt atoms is set by defining an appropriate initial guess (HS or BS) that is maintained along the optimization. The final unit cell parameters and coordinates are provided in Computational Data file.

Table S2. DFT calculation results for the molecules in one unit cell

|                                                 | <i>E</i> (Ry) | $\Delta E$ (cm <sup>-1</sup> ) <sup>a</sup> | $\Delta E/12$ (cm <sup>-1</sup> ) | Coupling strength(cm <sup>-1</sup> ) |
|-------------------------------------------------|---------------|---------------------------------------------|-----------------------------------|--------------------------------------|
| HS                                              | -4090.775981  |                                             |                                   |                                      |
| BS1                                             | -4090.793857  | -1962.80 ( $\Delta E_1$ )                   | -163.57                           | $J_1+J_3$                            |
| BS2                                             | -4090.787867  | -1305.10 ( $\Delta E_2$ )                   | -108.76                           | $J_1+J_2+J_3$                        |
| BS3                                             | -4090.787536  | -1268.80 ( $\Delta E_3$ )                   | -105.73                           | $J_2+2J_3$                           |
| $J_1=-83.30, \quad J_2=54.81, \quad J_3=-80.27$ |               |                                             |                                   |                                      |

$$^a \Delta E = E_{BS} - E_{HS}, \text{ KJ/mol} = \text{Ry}/2 * 627.51 * 4.184; \text{ cm}^{-1} = \text{KJ/mol} / (6.02 * 10^{-23}) / (1.986 * 10^{-23}) * 1000$$

First of all, here it should be emphasized that we do not know what is the proper *U* values for the cobalt in this magnetic system and there is no report involving this value. Therefore, we have to choose the *U* values from iron.<sup>7</sup> Although the *U* values influent the energy difference between the HS and BS state, the change is almost linear and below 10 KJ/mol (836 cm<sup>-1</sup>) per 0.2 eV of *U* (Fig. S6.). It is presumed that change value is *x* cm<sup>-1</sup>. We found that the selection of *U* values will not impact  $J_2$ ,

$$J_2 = (J_1+J_2+J_3) - (J_1+J_3) = (\Delta E_2+x) - (\Delta E_1+x) = \Delta E_2 - \Delta E_1$$

However, the  $J_1$  and  $J_3$  will be impacted by the half of  $x$ :

$$J_3 = [(J_2 + 2J_3) - J_2] / 2 = [(\Delta E_3 + x) - J_2] / 2 = (\Delta E_3 - \Delta E_2 + \Delta E_1) / 2 + x / 2$$

$$J_1 = (J_1 + J_3) - J_3 = (\Delta E_1 + x) - [(\Delta E_3 - \Delta E_2 + \Delta E_1) / 2 + x / 2] = [(-\Delta E_3 + \Delta E_2 + \Delta E_1) / 2 + x / 2]$$

Perhaps, the calculations are not accurate, but at least we can confirm qualitatively the exchange coupling constants between the  $\text{Co}^{2+}$  ions.

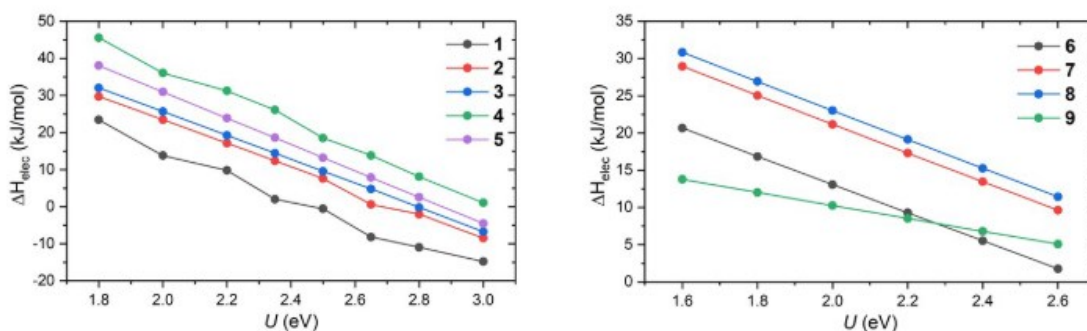

**Fig. S6.** Evolution of  $\Delta H_{elec}$  with  $U$  for (left) Fe<sup>II</sup> and (right) Fe<sup>III</sup> compounds (copied from ref. 7).

Secondly, we need to emphasize that the calculated magnetic interactions transferred by the three types of bridge here represent only an approximation of the magnetic interactions between the  $\text{Co}^{2+}$  centers. Several other possible contributions to the overall interactions, such as the nearest magnetic interactions, dipole-dipole interactions, and magnetic interactions transferred through the hydrogen bonds, are included into the covalent bridge interactions. Also, we don't consider the contribution of the orbital-spin coupling.

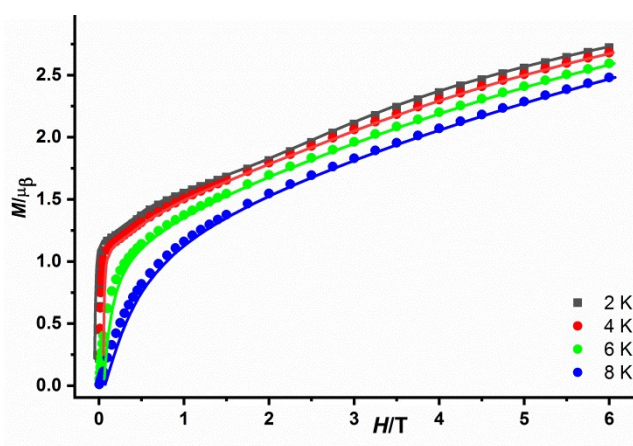

**Fig. S7** Isothermal field-dependence of the magnetization per  $\text{Co}_2$  at multiple temperatures for **1**. The solid lines are the best fits by the software Magpack at each temperature. The parameters for the best fit are  $J_1 = +0.10 \text{ cm}^{-1}$ ;  $J_2 = +11.15 \text{ cm}^{-1}$ ;  $J_3 =$

$+0.10 \text{ cm}^{-1}$ ;  $J_x=J_y=-8.10\text{cm}^{-1}$ ;  $J_z=1.50 \text{ cm}^{-1}$ ;  $D_1 = -0.01$ ;  $D_2 = -6.52$ ;  $E_1 = -0.01$ ;  $E_2 = -0.10$ ;  $g_1 = 2.4$ ;  $g_2 = 3.4$ .

### Dynamic magnetic properties

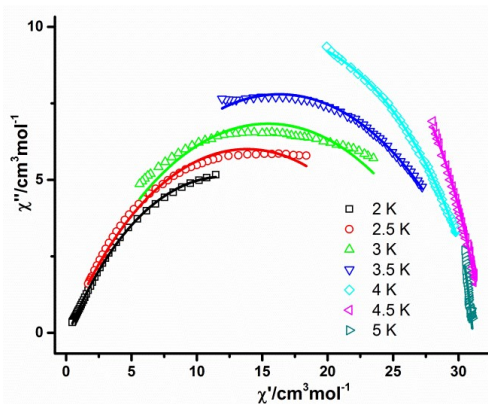

**Fig. S8.** The Cole-Cole plots of **1** at various temperatures, red lines are the best fits.

Table S3 The  $\alpha$  values from the fitting of the Cole-Cole plots of **1**

| <b>1</b> | $T/\text{K}$ | 2    | 2.5  | 3    | 3.5  | 4    | 4.5  |
|----------|--------------|------|------|------|------|------|------|
|          | $\alpha$     | 0.48 | 0.48 | 0.47 | 0.43 | 0.31 | 0.17 |

### References

- 1 J. J. Borrás-Almenar, J. M. Clemente-Juan, E. Coronado and B. S. Tsukerblat, *J. Comput. Chem.*, 2001, **22**, 985-991.
- 2 E. Ruiz, A. Rodríguez-Forteza, J. Cano, S. Alvarez and P. Alemany, *J. Comput. Chem.*, 2003, **24**, 982-989.
- 3 E. Ruiz, J. Cano, S. Alvarez and P. Alemany, *J. Comput. Chem.*, 1999, **20**, 1391-1400.
- 4 P. Giannozzi, O. Andreussi, T. Brumme, O. Bunau, M. Buongiorno Nardelli, M. Calandra, R. Car, C. Cavazzoni, D. Ceresoli, M. Cococcioni, N. Colonna, I. Carnimeo, A. Dal Corso, S. de Gironcoli, P. Delugas, R. A. DiStasio, A. Ferretti, A. Floris, G. Fratesi, G. Fugallo, R. Gebauer, U. Gerstmann, F. Giustino, T. Gorni, J. Jia, M. Kawamura, H. Y. Ko, A. Kokalj, E. Küçükbenli, M. Lazzeri, M. Marsili, N. Marzari, F. Mauri, N. L. Nguyen, H. V. Nguyen, A. Otero-de-la-Roza, L. Paulatto, S. Poncé, D. Rocca, R. Sabatini, B. Santra, M. Schlipf, A. P. Seitsonen, A. Smogunov, I. Timrov, T. Thonhauser, P. Umari, N. Vast, X. Wu and S. Baroni, *J. Phys.: Condens. Matter*, 2017, **29**.
- 5 P. Giannozzi, S. Baroni, N. Bonini, M. Calandra, R. Car, C. Cavazzoni, D. Ceresoli, G. L. Chiarotti, M. Cococcioni, I. Dabo, A. Dal Corso, S. de Gironcoli, S. Fabris, G. Fratesi, R. Gebauer, U. Gerstmann, C. Gougoussis, A. Kokalj, M. Lazzeri, L. Martin-Samos, N. Marzari, F. Mauri, R. Mazzarello, S. Paolini, A. Pasquarello, L. Paulatto, C. Sbraccia, S. Scandolo, G. Sclauzero, A. P. Seitsonen, A. Smogunov, P. Umari and R. M. Wentzcovitch, *J. Phys.: Condens. Matter*, 2009, **21**.
- 6 S. Grimme, *J. Comput. Chem.*, 2006, **27**, 1787-1799.
- 7 S. Vela, M. Fumanal, J. Cirera and J. Ribas-Arino, *Phys. Chem. Chem. Phys.*, 2020, **22**, 4938-4945.

8 J. M. Holland, S. A. Barrett, C. A. Kilner and M. A. Halcrow, *Inorg. Chem. Commun.*, 2002, **5**, 328-332.
